## PROPOSED TITLE: “Comparing the evolutionary dynamics of predominant SARS-CoV-2 virus lineages co-circulating in Mexico”

### AUTHOR LIST AND AFFILIATIONS

Hugo G. Castelán-Sánchez<sup>1,2,†</sup>, Luis Delaye<sup>1,3,†</sup>, Rhys P. D. Inward<sup>4,†</sup>, Simon Dellicour<sup>5,6,†</sup>, Bernardo Gutierrez<sup>1,4,†</sup>, Natalia Martínez de la Vina<sup>4</sup>, Celia Boukadida<sup>1,7</sup>, Oliver G Pybus<sup>4,8</sup>, Guillermo de Anda Jáuregui<sup>1,2,9</sup>, Plinio Guzmán<sup>10</sup>, Marisol Flores Garrido<sup>11</sup>, Óscar Fontanelli<sup>1,3</sup>, Maribel Hernández Rosales<sup>1,3</sup>, Amilcar Meneses<sup>11</sup>, Gabriela Olmedo-Alvarez<sup>1,3</sup>, Alfredo Herrera-Estrella<sup>1,12</sup>, , Alejandro Sanchez-Flores<sup>1,14</sup>, José Esteban Muñoz-Medina<sup>1,15</sup>, Andreu Comas-García<sup>1,16</sup>, Bruno Gómez-Gil<sup>1,17</sup>, Selene Zárate<sup>1,18</sup>, Blanca Taboada<sup>1,19</sup>, Susana López<sup>1,19</sup>, Carlos F. Arias<sup>1,19</sup>, Moritz U.G. Kraemer<sup>1,4</sup>, Antonio Lazcano<sup>1,20</sup>, Marina Escalera-Zamudio<sup>1,4,\*</sup>

<sup>1</sup> Consorcio Mexicano de Vigilancia Genómica (CoViGen-Mex)

<sup>2</sup> Programa de Investigadoras e Investigadores por México, Consejo Nacional de Ciencia y Tecnología. Av. Insurgentes Sur 1582, Crédito Constructor, Benito Juárez, CP 03940, Ciudad de México, México

<sup>3</sup> Departamento de Ingeniería Genética, CINVESTAV-Unidad Irapuato, Km. 9.6 Libramiento Norte Carretera Irapuato-León CP 36824 Irapuato, Guanajuato, México

<sup>4</sup> Department of Biology, University of Oxford, Parks Rd OX1 3PS, Oxford, United Kingdom

<sup>5</sup> Spatial Epidemiology Lab (SpELL), Université Libre de Bruxelles, Av. Franklin Roosevelt 50, 1050 Bruxelles, Belgium

<sup>6</sup> Department of Microbiology, Immunology and Transplantation, Rega Institute, KU Leuven, Herestraat 49, 3000 Leuven, Belgium

<sup>7</sup> Centro de Investigación en Enfermedades Infecciosas, Instituto Nacional de Enfermedades Respiratorias, Calz. de Tlalpan 4502, Belisario Domínguez Secc 16, CP 14080, Ciudad de México, México

<sup>8</sup> Department of Pathobiology, Royal Veterinary College, 4 Royal College St, NW1 0TU, London, United Kingdom

<sup>9</sup> Instituto Nacional de Medicina Genómica, Periférico Sur 4809, Arenal Tepepan, Tlalpan, CP 14610, Ciudad de México, México

<sup>10</sup> Astronomer LTD, Ciudad de México, México

<sup>11</sup> Escuela Nacional de Estudios Superiores, Unidad Morelia, Universidad Nacional Autónoma de México, Antigua Carretera a Pátzcuaro, No. 8701 Col. Ex-Hacienda de San José de La Huerta, CP 58190 Morelia, Michoacán, México.

<sup>12</sup> Departamento de Ciencias de la Computación, CINVESTAV-IPN, Av. IPN 2508, Gustavo A. Madero, San Pedro Zacatenco, CP 07360, Ciudad de México, México

<sup>13</sup> Laboratorio Nacional de Genómica para la Biodiversidad-Unidad de Genómica Avanzada, CINVESTAV-Unidad Irapuato, Km 9.6 Libramiento Norte Carretera Irapuato-León, CP 36824, Irapuato, Guanajuato, México

<sup>14</sup> Unidad Universitaria de Secuenciación Masiva y Bioinformática, Instituto de Biotecnología, Universidad Nacional Autónoma de México, Avenida Universidad 2001, Chamilpa, CP 62210, Cuernavaca, Morelos, México.

<sup>15</sup> Coordinación de Calidad de Insumos y Laboratorios Especializados, Instituto Mexicano del Seguro Social, José Urbano Fonseca Núm. 6 Magdalena de las Salinas, CP 07760, Ciudad de México, México

<sup>16</sup> Facultad de Medicina y Centro de Investigación en Ciencias de la Salud y Biomedicina, Universidad Autónoma de San Luis Potosí, Av. Sierra Leona 550, lomas 2a Sección, Lomas de San Luis, CP 78120, San Luis Potosí, México

<sup>17</sup> Centro de Investigación en Alimentación y Desarrollo-CIAD, Unidad Regional Mazatlán en Acuicultura y Manejo Ambiental, Av. Sábalo Cerritos S/N, Cerritos CP 82112, Mazatlán, Sinaloa, México.

<sup>18</sup> Posgrado en Ciencias Genómicas, Universidad Autónoma de la Ciudad de México, Calle Dr. García Diego 168, Doctores, Cuauhtémoc, CP 06720 Ciudad de México, México

<sup>19</sup> Departamento de Genética del Desarrollo y Fisiología Molecular, Instituto de Biotecnología, Universidad Nacional Autónoma de México, Avenida Universidad 2001, CP 62210 Cuernavaca, Morelos, México

<sup>20</sup> Facultad de Ciencias, Universidad Nacional Autónoma de México, Av. Universidad 3000, Circuito Exterior s/n, Coyoacán, CP 04510, Ciudad Universitaria, Ciudad de México, México

ORCID 0000-0002-4763-0267 Hugo G Castelán-Sánchez [hugo.castelan@conacyt.mx](mailto:hugo.castelan@conacyt.mx)

ORCID 0000-0003-4193-2720 Luis Delaye [luis.delaye@cinvestav.mx](mailto:luis.delaye@cinvestav.mx)

ORCID 0000-0003-0016-661X Rhys Inward [rhys.inward@biology.ox.ac.uk](mailto:rhys.inward@biology.ox.ac.uk)

ORCID 0000-0001-9558-1052 Simon Dellicour [simon.dellicour@ulb.be](mailto:simon.dellicour@ulb.be)

ORCID 0000-0002-9220-2739 Bernardo Gutierrez [bernardo.gutierrez@biology.ox.ac.uk](mailto:bernardo.gutierrez@biology.ox.ac.uk)

Natalia Martínez de la Vina [nataliamv@gmail.com](mailto:nataliamv@gmail.com)

ORCID 0000-0002-8797-2667 Oliver G Pybus [oliver.pybus@biology.ox.ac.uk](mailto:oliver.pybus@biology.ox.ac.uk)

ORCID 0000-0002-7749-0365 Guillermo de Anda Jáuregui [gdeanda@inmegen.edu.mx](mailto:gdeanda@inmegen.edu.mx)

Plinio Guzmán [pgzmnk@gmail.com](mailto:pgzmnk@gmail.com)

ORCID 0000-0003-1620-7885 Marisol Flores-Garrido [mflores@enesmorelia.unam.mx](mailto:mflores@enesmorelia.unam.mx)

ORCID 0000-0002-2381-7035 Óscar Fontanelli [ofontanelli@ciencias.unam.mx](mailto:ofontanelli@ciencias.unam.mx)

ORCID 0000-0003-1878-1223 Maribel Hernández Rosales [maribel.hr@cinvestav.mx](mailto:maribel.hr@cinvestav.mx)

ORCID 0000-0003-1976-6199 Amilcar Meneses [ameneses@cs.cinvestav.mx](mailto:ameneses@cs.cinvestav.mx)

ORCID 0000-0003-2122-7506 Gabriela Olmedo-Alvarez [golmedo@cinvestav.mx](mailto:golmedo@cinvestav.mx)

ORCID 0000-0002-4589-6870 Alfredo Herrera-Estrella [alfredo.herrera@cinvestav.mx](mailto:alfredo.herrera@cinvestav.mx)

ORCID 0000-0002-1744-0083 Celia Boukadida [celia.boukadida@cieni.org.mx](mailto:celia.boukadida@cieni.org.mx)

ORCID 0000-0003-0476-3139 Alejandro Sánchez-Flores [alejandro.sanchez@ibt.unam.mx](mailto:alejandro.sanchez@ibt.unam.mx)

ORCID 0000-0002-1289-4457 José Esteban Muñoz-Medina [eban10@hotmail.com](mailto:eban10@hotmail.com)

ORCID 0000-0002-2368-1529 Andreu Comas-García [andreu.comas@uaslp.mx](mailto:andreu.comas@uaslp.mx)

ORCID 0000-0002-3695-3597 Bruno Gómez-Gil [bruno@ciad.mx](mailto:bruno@ciad.mx)

ORCID 0000-0003-1034-204X Selene Zárate [selene.zarate@uacm.edu.mx](mailto:selene.zarate@uacm.edu.mx)

ORCID 0000-0003-1896-5962 Blanca Taboada [btaboada@ibt.unam.mx](mailto:btaboada@ibt.unam.mx)

ORCID 0000-0001-6336-9209 Susana López [susana.lopez@ibt.unam.mx](mailto:susana.lopez@ibt.unam.mx)

ORCID 0000-0003-3130-4501 Carlos F Arias [arias@ibt.unam.mx](mailto:arias@ibt.unam.mx)

ORCID 0000-0001-8838-7147 Moritz Kraemer [moritz.kraemer@biology.ox.ac.uk](mailto:moritz.kraemer@biology.ox.ac.uk)

ORCID 0000-0001-7365-8557 Antonio Lazcano [alar@ciencias.unam.mx](mailto:alar@ciencias.unam.mx)

ORCID Marina Escalera-Zamudio [marina.escaleramudio@biology.ox.ac.uk](mailto:marina.escaleramudio@biology.ox.ac.uk)

† HGCS, LD, RPD, SD and BG contributed equally to this work

\* Corresponding author: Marina Escalera-Zamudio [marina.escaleramudio@biology.ox.ac.uk](mailto:marina.escaleramudio@biology.ox.ac.uk)

## **ABSTRACT (143/150 WORDS)**

Over 200 different SARS-CoV-2 lineages have been observed in Mexico by November 2021. To investigate lineage replacement dynamics, we applied a phylodynamic approach and explored the evolutionary trajectories of five dominant lineages that circulated during the first year of local transmission. For most lineages, peaks in sampling frequencies coincided with different epidemiological waves of infection in Mexico. Lineages B.1.1.222 and B.1.1.519 exhibited similar dynamics, constituting clades that likely originated in Mexico and persisted for >12 months. Lineages B.1.1.7, P.1 and B.1.617.2 also displayed similar dynamics, characterized by multiple introduction events leading to a few successful extended local transmission chains that persisted for several months. For the largest B.1.617.2 clades, we further explored viral lineage movements across Mexico. Many clades were located within the south region of the country, suggesting that this area played a key role in the spread of SARS-CoV-2 in Mexico.

## 1 MAIN TEXT (8229 WORDS)

### 2 INTRODUCTION

3 Genome sequencing efforts for the surveillance of the Severe Acute Respiratory Syndrome  
4 Coronavirus-2 (SARS-CoV-2) has granted public access to a massive number of virus genomes  
5 generated worldwide (<https://www.gisaid.org/>). Exploring SARS-CoV-2 genome data using  
6 phylodynamic and molecular evolution tools has allowed researchers to characterize increasing virus  
7 diversity <sup>1</sup>, track emerging viral subpopulations, and explore virus evolution in real-time, both at local  
8 and global scales (for examples see <sup>2-6</sup>). Throughout the development of the COVID-19 pandemic, viral  
9 variants have emerged and circulated across different regions of the world <sup>2,7</sup>, displaying specific  
10 mutations that define their phylogenetic patterns <sup>8,9</sup>. The emergence and spread of SARS-CoV-2  
11 lineages has been routinely monitored since early 2021, informing public health authorities on their  
12 responses to the ongoing pandemic <sup>10</sup>.

13 Emerging virus lineages are classified using a dynamic nomenclature system ('Pango system',  
14 Phylogenetic Assignment of Named Global Outbreak Lineages), developed to consistently assign newly  
15 generated genomes to existing lineages, and to designate novel virus lineages according to their  
16 phylogenetic identity and epidemiological relevance <sup>11,12</sup>. Virus lineages that may pose an increased  
17 risk to global health have been classified as Variants of Interest (VOI), Variants under Monitoring (VUM),  
18 and Variants of Concern (VOC), potentially displaying one or more of the following biological properties  
19 <sup>9,13</sup>: increased transmissibility <sup>14</sup>, decreasing the effectiveness of available diagnostics or therapeutic  
20 agents (such as monoclonal antibodies)<sup>15</sup>, and evasion of immune responses (including vaccine-  
21 derived immunity) <sup>10,16,17</sup>. Up to date, five SARS-CoV-2 lineages (including all descending sub-lineages)  
22 have been designated as VOC: B.1.1.7 (Alpha), B.1.351 (Beta), P.1 (Gamma), B.1.617.2 (Delta), and  
23 B.1.1.529 (Omicron) <sup>10,18,19</sup>.

24 Virus lineages that dominate across various geographic regions are likely to have an  
25 evolutionary advantage, driven in part by a genetic increase in virus fitness (*i.e.*, mutations enhancing  
26 transmissibility and/or immune escape) <sup>20-24</sup>. Moreover, the spread of different VOC across the world  
27 has been linked to human movement, often resulting in the replacement of previously dominating virus  
28 lineages <sup>10</sup>. However, exploring lineage replacement and fitness dynamics remains a challenge, as they  
29 are impacted by numerous factors, including differential and stochastic growth rates that vary across  
30 geographic regions, a shifting immune structure of the host population (linked to viral pre-exposure

31 levels and vaccination rates),<sup>23,24</sup> and changing social behaviours (such as fluctuating human mobility  
32 patterns and the implementation of local non-pharmaceutical interventions across time)<sup>23,25,26</sup>. Thus,  
33 the epidemiological and evolutionary mechanisms enabling some lineages to spread and become  
34 dominant across distinct geographic regions, whilst others fail to do so, remain largely understudied.

35 Mexico has been severely impacted by the COVID-19 pandemic, evidenced by a high number  
36 of cumulative deaths relative to other countries in Latin America<sup>27</sup>. Since the first introductions of the  
37 virus in early 2020 and up to November 2021<sup>28</sup>, the local epidemiological curve fluctuated between  
38 three waves of infection (observed in July 2020, January 2021, and August 2021)<sup>27-29</sup>. Prior to the first  
39 peak of infection, non-pharmaceutical interventions (including social distancing and suspension of non-  
40 essential activities) were implemented at a national scale from March 23<sup>rd</sup> 2020 to May 30<sup>th</sup> 2020.  
41 Nonetheless, a reopening plan for the country was already announced in May 13<sup>th</sup> 2020, whilst the  
42 national vaccination campaign did not begin before December 2020<sup>27</sup>. The 'Mexican Consortium for  
43 Genomic Surveillance' (abbreviated CoViGen-Mex)<sup>30</sup> was launched in February 2021, establishing  
44 systematic sequencing effort for a genomic epidemiology-based surveillance of SARS-CoV-2 in Mexico.  
45 In close collaboration with the national ministry of health, and driven by the sequencing capacity in the  
46 country, the program aimed to sequence per month 1,200 representative samples derived from positive  
47 cases recorded throughout national territory, based on the proportion of cases reported across states.  
48 During May 2021, the sequencing scheme was upgraded to follow the official case report line, in order  
49 to better coordinate case reporting and genome sampling across the country.

50 Over 80,000 SARS-CoV-2 genomes from Mexico are available in GISAID  
51 (<https://www.gisaid.org/>), with approximately one third of these generated by CoViGen-Mex<sup>30</sup> (with  
52 other national institutions sequencing the rest). From 2020 to 2021 (corresponding to the first year of  
53 the epidemic in the country), more than 200 different virus lineages were detected, including all VOC  
54 <sup>19,31</sup>. During this time, different virus lineages co-circulated across national territory, an observation of  
55 particular relevance in the context of recombinant SARS-CoV-2 lineages that emerged in North America  
56 during 2021<sup>32</sup>. Some virus lineages also displayed specific dominance and replacement patterns  
57 distinct to those observed in neighbouring countries (namely the USA)<sup>30,33,34</sup>. Taking this into  
58 consideration, we hypothesize that the SARS-CoV-2 dominance and replacement patterns observed in  
59 Mexico during 2020 to 2021 were driven by lineage-specific mutations impacting local growth rates,  
60 further shaped by the immune landscape of the local host population (depending mostly on virus pre-

61 exposure levels at that time). Furthermore, we expect that viral diffusion processes within the country  
62 to be associated with local human mobility patterns, and anticipate that the SARS-CoV-2 epidemic in  
63 Mexico has been impacted by the epidemiological behaviour within neighbouring countries.

64 In this light, we set to investigate the introduction, spread and replacement dynamics of five  
65 virus lineages that dominated during the first year of the epidemic in Mexico: B.1.1.222, B.1.1.519,  
66 B.1.1.7, P.1 and B.1.617.2<sup>30,33,34</sup>. For this, we undertook a phylodynamic approach to analyse  
67 cumulative SARS-CoV-2 genome data publicly available from Mexico within the context of virus genome  
68 data collected worldwide, and further devised a human migration and phylogenetic-informed  
69 subsampling approach to increase robustness of tailored phylogeographic analyses. To investigate  
70 lineage-specific spatial epidemiology, we contrasted our phylodynamic results to epidemiological and  
71 human mobility data from the country, focusing on quantifying lineage importations into Mexico and on  
72 characterizing local extended transmission chains across geographic regions (*i.e.*, states). Our analysis  
73 revealed similar dynamics for the B.1.1.222 and B.1.1.519 lineages, with both likely originating in  
74 Mexico, and denoting single extended transmission chains sustained for over a year. For P.1, B.1.1.7  
75 and B.1.617.2 lineages, multiple introduction events were identified, with a few large transmission  
76 chains across the country detected. For B.1.617.2 (represented by C5d, the largest and most genetically  
77 diverse clade identified), we observed a within-the-country virus diffusion pattern seeding from the south  
78 with subsequent movement into the central and north. We further find that Mexico's southern border  
79 may have played an important role in the introduction and spread of SARS-CoV-2 across the country.

80

## 81 **RESULTS**

82 The sampling date of this study comprises January 2020 to November 2021, corresponding to the first  
83 year of the epidemic in Mexico, just before the introduction of 'Omicron' (B.1.1.529) into the country  
84<sup>30,33,34</sup>. Our comparative analysis on the temporal distribution of virus lineages in Mexico confirmed  
85 previous published observations<sup>19,33,34</sup> showing that relative to other virus lineages circulating at the  
86 time, only the B.1.1.222, B.1.1.519, B.1.1.7 (Alpha), P.1 (Gamma) and B.1.617.2 (Delta) lineages  
87 displayed a dominant prevalence pattern within the country. Moreover, for most of these dominant  
88 lineages, peaks in genome sampling frequency (defined here as the proportion of viral genomes  
89 assigned to a specific lineage, relative to the proportion of viral genomes assigned to any other virus

90 lineage in a given time point) often coincided with the epidemiological waves of infection recorded  
91 (except for B.1.1.7 and P.1) (**Figure 1a and b**).

92         During this time, Mexico reported a daily mean test rate ranging between 0.13-0.18 test per  
93 1,000 inhabitants <sup>29</sup>. Despite a lower testing rate compared to other countries, the cumulative number  
94 of viral genomes generated throughout 2020 and 2021 (both by CoViGen-Mex and other national  
95 institutions) correlates with the number of cases recorded at a national scale, corresponding to  
96 approximately 100 viral genomes per 10,000 cases, or sequencing ~1% of the official COVID-19 cases  
97 (**Figure 1 - figure supplement 1**). Although SARS-CoV-2 sequencing remained centralized to Mexico  
98 City, the proportion of viral genomes per state also roughly coincided with the spatial distribution of  
99 confirmed cases (with Mexico City reporting most cases), as stated officially <sup>35</sup> (**Figure 1 - figure  
100 supplement 1**). Therefore, SARS-CoV-2 sequencing in Mexico has been sufficient to explore the  
101 spatial and temporal frequency of viral lineages across national territory <sup>30,33,34</sup>, and now to further  
102 investigate the number of lineage-specific introduction events, and to characterize the extension and  
103 geographic distribution of associated transmission chains, as we present in this study.

104

#### 105 **B.1.1.222**

106 The B.1.1.222 lineage circulated in North America between April 2020 and September 2021, mostly  
107 within the USA (~ 80% of all B.1.1.222-assigned genomes) and Mexico (~ 20% of all B.1.1.222-  
108 assigned genomes). With limited reports from other regions of the world, B.1.1.222 was thus considered  
109 as endemic to the region (<https://cov-lineages.org/>) <sup>36</sup>. The first B.1.1.222-assigned genome was  
110 sampled from Mexico on April 2020 (Mexico/CMX-INER-0026/2020-04-04) <sup>36</sup>, whilst the last B.1.1.222-  
111 assigned genome was sampled from the USA on September 2021 (USA/CA-CDPH-1002006730/2021-  
112 09-14). The latest sampling date for B.1.1.222 in Mexico corresponds to July 2021  
113 (Mexico/CHH\_INER\_IMSS\_1674/2021-07-26), two months before the latest sampling date of the  
114 lineage at an international scale.

115         We observe that in Mexico, the B.1.1.222 lineage was continuously detected between April  
116 2020 and May 2021, followed by a steady decline after July 2021 (**Figure 1b**). During its circulation  
117 period, most B.1.1.222 genomes were collected from the central region of the country, represented by  
118 Mexico City (CMX; **Figure 2a**). For B.1.1.222, a rising genome sampling frequency was observed from  
119 May 2020 onwards, coinciding with the first epidemiological wave recorded during July 2020.

120 Subsequently, genome sampling frequency progressively increased to reach a highest of 35% recorded  
121 in October 2020, denoting established dominance before the emergence and spread of B.1.1.519  
122 (**Figure 1b**). Data corresponding to the first year of the epidemic available up to February 2021 (as  
123 analysed by Taboada et al. 2021<sup>19,33,34</sup>) initially estimated that the B.1.1.222 lineage had reached a  
124 maximum genome sampling frequency of approximately 10%. Compared to our results, this revealed  
125 an important frequency underestimation (10% vs 35%), attributable to the fact that the vast majority of  
126 B.1.1.222-assigned genomes from Mexico (>80%) were generated, assigned and submitted to GISAID  
127 after February 2021. Of note, in the USA, the B.1.1.222 lineage reached a maximum genome sampling  
128 frequency of 3.5%, compared to 35% observed in Mexico. Thus, more B.1.1.222-assigned genomes  
129 from the USA compared to Mexico reflects sequencing disparities across countries<sup>1</sup>, and contrasts with  
130 the region-specific epidemiological scenarios.

131 Phylodynamic analysis for the B.1.1.222 lineage revealed one main clade deriving from a single  
132 MRCA (most recent common ancestor) (**Figure 2a**). The inferred date for this MRCA corresponds to  
133 March 2020, denoting a cryptic circulation period of a month (before the earliest sampling date for the  
134 lineage within the country, see Methods section 4). The 'most likely' location for this earliest MRCA  
135 (supported by a relative PP of 0.99) was inferred to be 'Mexico', denoting lineage emergence. Thus,  
136 subsequent 'introductions' should be interpreted as 're-introduction' events into the country (with dates  
137 ranging from October 2020 to July 2021). After emergence, B.1.1.222 was seeded into the USA from  
138 Mexico multiple times. In this context, we estimate a minimum of 237 introduction events from Mexico  
139 into the USA (95% HPD interval = [225-250]), and a minimum of 106 introduction events from the USA  
140 into Mexico (95% HPD interval = [95-122]; **Figure 2a**). Based on inferred node dates (for MRCAs) in  
141 the MCC tree, the B.1.1.222 lineage displayed a total persistence of up to 16 months.

142

### 143 **B.1.1.519**

144 Directly descending from B.1.1.222 (**Figure 1a**), the B.1.1.519 lineage circulated in North America  
145 between August 2020 and November 2021, mostly within the USA (~ 60% of all B.1.1.519-assigned  
146 genomes) and Mexico (~ 30% of all B.1.1.519-assigned genomes). As for B.1.1.222, B.1.1.519 genome  
147 reporting from other countries was limited, and the B.1.1.519 lineage was also considered as endemic  
148 to the region (<https://cov-lineages.org/>)<sup>34,37-39</sup>. At an international scale, the earliest B.1.1.519-assigned  
149 genome was sampled from the USA on July 2020 (USA/TX-HMH-MCoV-45579/2020-07-31)<sup>40</sup>, whilst

150 the latest B.1.1.519-assigned genome was sampled from Mexico on December 2021  
151 (Mexico/CHP\_IBT\_IMSS\_5310/2021-12-27)<sup>41</sup>. During initial phylogenetic assessment, we noted that  
152 most of B.1.1.519-assigned genomes collected after November 2021 came from outside North America  
153 (namely, from Turkey and Africa). These were further identified as outliers within the tree, likely to be  
154 sequencing errors resulting from the use of an inadequate reference sequence for genome assembly,  
155 and thus were excluded from further analyses. In Mexico, the B.1.1.519 lineage was first detected on  
156 August 2020 (Mexico/YUC-NYGC-39037-20/2020-08-28)<sup>34</sup>.

157 Our analysis derived from cumulative genome data from Mexico shows that B.1.1.519  
158 displayed an increasing genome sampling frequency observed between September 2020 and July 2021  
159 (**Figure 1b**). During these months, the spread of B.1.1.519 raised awareness in public health  
160 authorities, leading to its designation as a VUM in June 2021<sup>10,34,38,39</sup>. During its circulation period, most  
161 B.1.1.519 genomes were sampled from the central region of the country, represented by the state of  
162 Puebla (PUE; **Figure 2b**). We further observed that by late January 2021, up to 75% of the virus  
163 genomes sequenced in Mexico were assigned as B.1.1.519, with the lineage dominating over the  
164 second wave of infection recorded (**Figure 1 b**). Similar to B.1.1.222, in the USA, B.1.1.519 only  
165 reached a maximum genome sampling frequency of 5% (up to April 2021). Compared to the 75%  
166 observed in Mexico, this once again contrast to the epidemiological scenario observed in each country,  
167 further exposing sequencing disparities<sup>36,40</sup>.

168 Phylodynamic analysis for the B.1.1.519 lineage revealed a similar pattern to the one observed  
169 for B.1.1.222, with one main clade deriving from a single MRCA (**Figure 2b**). The inferred date for this  
170 MRCA corresponds to July 2020, again with a 'most likely' source location inferred to be 'Mexico' (PP:  
171 0.99). Thus, our results suggest that B.1.1.519 circulated cryptically in Mexico for one month prior to its  
172 initial detection (**Figure 2b**). After its emergence, the B.1.1.519 lineage was seeded back and forth  
173 between the USA and Mexico, with subsequent 're-introduction events' into the country occurring  
174 between July 2020 and November 2021. In this light, we estimate a minimum number of 121 introduction  
175 events from the USA into Mexico (95% HPD interval = [109-132]), compared to a minimum number of  
176 391 introduction events from Mexico into the USA (95% HPD interval = [380-402]) (**Figure 2b**). Based  
177 on inferred node dates in the MCC tree, the B.1.1.519 lineage displayed a total persistence of over 16  
178 months.

179



180 **B.1.1.7**

181 The B.1.1.7 lineage was first detected in the UK in September 2020, spreading to more than 175  
182 countries in over a year<sup>42</sup>. The earliest B.1.1.7-assigned genome from Mexico was sampled on late  
183 December 2020 (Mexico/TAM-InDRE-94/2020-12-31), while the latest B.1.1.7-assigned genome was  
184 sampled on October 2021 (Mexico/QUE\_InDRE\_FB47996\_S8900/2021-10-13). Our analysis derived  
185 from cumulative genome data from the country revealed a continuous detection between February and  
186 September 2021. A peak in genome sampling frequency was observed around May 2021, coinciding  
187 with a lower number of cases recorded at the time (**Figure 1b**). Our results further confirm that the  
188 B.1.1.7 lineage reached an overall lower sampling frequency of up to 25% (relative to other virus  
189 lineages circulating in the country), as noted prior to this study (for example, see Zárata et al. 2022)  
190 <sup>27,29,43</sup>. Of interest, similar observations were independently made for other Latin American countries,  
191 such as Brazil, Chile, and Peru (<https://www.gisaid.org/>), likely denoting region-specific dynamics for  
192 this lineage.

193 Phylodynamic analysis for B.1.1.7 revealed an earliest MRCA dating to late October 2020,  
194 denoting a cryptic circulation period of approximately two months prior to detection in the country. The  
195 earliest genome sampling date also coincides with at least four independent and synchronous  
196 introduction events that date back to December 2020 (**Figure 3a**). In total, we estimated a minimum of  
197 224 introduction events into Mexico (95% HPD interval = [219-231]). Potentially linked to the  
198 establishment of a systematic genome sequencing in Mexico, most of these were identified after  
199 February 2021. Within the MCC, we further identified seven clades (C1a to C7a) representing extended  
200 local transmission chains, with C3 and C7 being the largest (**Figure 3a, Supplementary file 2**). During  
201 its circulation period, most B.1.1.7 genomes from Mexico were generated from the state of Chihuahua,  
202 with these also representing the earliest B.1.1.7-assigned genomes from the country<sup>34,44</sup>. However, our  
203 analysis revealed that only a small proportion of these genomes grouped within a larger clade denoting  
204 an extended transmission chain (C2a), with the rest falling within minor clusters, or representing  
205 singleton events (**Figure 3a**). Relative to other states, Chihuahua generated an overall lower proportion  
206 of viral genomes throughout 2020-2021. Thus, more viral genomes sequenced from a particular state  
207 does not necessarily translate into more well-supported clades denoting extended transmission chains,  
208 whilst the geographic distribution of clades is somewhat independent to the genome sampling across  
209 the country.

210 For the larger C3a and C7a clades, both MRCA's date to February 2021, denoting independent  
211 and synchronous introduction events (**Figure 3a**). The C3a comprises genomes collected from 22/32  
212 states in the country, predominantly from Mexico City (CMX), followed by southern states of Yucatán  
213 (YUC) and Quintana Roo (ROO) (**Figure 3 - figure supplement 1**). The C3a displayed a persistence  
214 of three months: from March to June 2021. For the C7a, viral genomes were sampled from 20/32 states  
215 of the country, with >70% of these coming from the southern state of Tabasco (TAB) and north-eastern  
216 state of Tamaulipas (TAM) (**Figure 3 - figure supplement 1**). The C7a displayed a persistence of four  
217 months: from March to July 2021. Based on inferred node dates within the MCC tree, the B.1.1.7 lineage  
218 displayed a total persistence of approximately 10 months.

219

## 220 P.1

221 The P.1 lineage was first detected in Brazil during October 2020<sup>45</sup>, after which it diverged into >20 sub-  
222 lineages that spread to different parts of the world<sup>19</sup>. Relevant to North America, P.1.17 was the most  
223 prevalent sub-lineage detected within the region, again sampled mostly from the USA (~ 60% of all  
224 sequences) and from Mexico (~ 30% of all sequences, <https://cov-lineages.org/>)<sup>19</sup>. In Mexico, we  
225 detected at least 13 P.1 sub-lineages, with the majority of assigned viral genomes belonging to the  
226 P.1.17 (66%), and to a lesser extent to the parental P.1 lineage (25%), as was noted prior to this study  
227<sup>31</sup>. As our dataset comprises viral genomes assigned to the P.1 and descending sub-lineages, it is  
228 henceforth referred here as a P.1+.

229 The earliest P.1+ genome from Mexico was sampled on late January 2021 (Mexico/JAL-  
230 InDRE\_245/2021-01-28) and the latest on November 2021 (Mexico/ROO\_IBT\_IMSS\_4502/2021-11-  
231 19). Cumulative genome data analysis from the country revealed a similar pattern to that observed for  
232 B.1.1.7, in which P.1+ genome sampling frequency peaked around April-May 2021, with almost no  
233 detection after September 2021. As for B.1.1.7, P.1+ showed an overall lower genome sampling  
234 frequency reaching a highest of 25%, again coinciding with a decrease in the number of cases following  
235 the second wave of infection recorded (**Figure 1b**)<sup>31,33,34</sup>. During its circulation period in the country,  
236 the majority of P.1+ -assigned genomes were sampled from the states Yucatan and Quintana Roo  
237 (YUC and ROO; **Figure 3b**).

238 Our phylodynamic analysis for P.1+ revealed a minimum number of 126 introduction events  
239 into Mexico (95% HPD interval = [120-132]). Within the MCC tree, we identified two well-supported

240 clades denoting extended local transmission chains: C1\_P1 (corresponding to P.1) and C1\_P1\_17  
241 (corresponding to P.1.17) (**Figure 3b, Supplementary file 2**). The MRCA of the C1\_P1 clade dates to  
242 March 2021, showing a persistence of seven months: from March to October 2021. The MRCA of  
243 C1\_P1\_17 dates to October 2020, corresponding to the TMRCA of the global P.1+ clade in the MCC  
244 tree. The long branch separating this earliest MRCA and the earliest sampled sequence reveals a  
245 considerable lag between lineage emergence and first detection, likely resulting from sub-lineage  
246 under-sampling (**Figure 3b**). Therefore, it is not possible to estimate a total lineage persistence based  
247 on inferred node dates. Thus, considering tip dates only, the C1\_P1\_17 clade showed a persistence of  
248 five months (earliest collection date: 01/04/2021, latest collection date: 17/09/2021). For the P.1  
249 parental lineage, two clusters of MRCAs representing subsequent introduction events with no evidence  
250 of extended transmission were identified (referred here as clade C1\_P1 MRCAs 1 and 2). Similarly, for  
251 the P.1.17, another cluster of MRCAs representing subsequent introduction events with no evidence of  
252 extended transmission was also identified (referred here as C1\_P1\_17 MRCAs) (**Figure 3b**).

253         The C1\_P1 clade directly descends from viral genomes sampled from South America, and is  
254 mostly represented by viral genomes collected from the central region of the country (>40% of these  
255 coming from Mexico City and the State of Mexico; CMX and MEX) (**Figure 3 - figure supplement 2**).  
256 The C1\_P1\_17 clade is mostly represented by viral genomes from Mexico (75%), and to a lesser extent  
257 by genomes from the USA (20%). 'Mexico' genomes are positions basally to the C1\_P1\_17 clade,  
258 collected predominantly from the southern region of the country (>90%, represented by the states of  
259 Quintana Roo and Yucatán, ROO and YUC) (**Figure 3 - figure supplement 2**). Overall, our results  
260 indicate that in Mexico, the P.1 parental lineage was introduced independently and later than P.1.17,  
261 likely from distinct geographic locations. Contrasting to P.1, the P.1.17 lineage displayed a more  
262 successful spread, denoted by a sustained transmission chain located to the southern region of the  
263 country.

264 **B.1.617.2**

265 Initially detected in India during October 2020, the B.1.617.2 lineage spread globally to become  
266 dominant, and was later associated with an increase in COVID cases recorded globally following March  
267 2021<sup>46,47</sup>. The parental B.1.617.2 lineage further diverged into >230 descending sub-lineages  
268 (designated as the AY.X) that spread to different regions of the world<sup>19,46,48</sup>. Again, as our dataset  
269 comprises both B.1.617.2 and AY. X-assigned genomes, it is henceforth referred here as a B.1.617.2+.

270 The first 'B.1.617.2-like' genome from Mexico was sampled on September 2020 (Mexico/AGU-  
271 InDRE\_FB18599\_S4467/2020-09-22), followed by a sporadic genome detection throughout January  
272 2021 (with <10 sequences)<sup>49</sup>. However, the comparative analysis on genome sampling frequencies  
273 revealed that expansion of B.1.617.2+ only occurred after April 2021 (**Figure 1b**). We further confirmed  
274 that by August 2021, the lineage had reached a relative frequency of >95%, coinciding with the peak of  
275 the third wave of infection recorded in the country<sup>50</sup>. Up to the sampling date of this study, we detected  
276 >80 B.1.617.2 sub-lineages (AY.X) circulating in Mexico, with most viral genomes assigned as AY.20  
277 (22%), AY.26 (13%), and AY.100 (5%), followed by AY.113, AY.62 and AY.3. Of interest, these were  
278 previously noted to be mostly prevalent within North America (<https://cov-lineages.org/>)<sup>51-55</sup>. During its  
279 circulation period, B.1.617.2+ displayed a more homogeneous genome sampling distribution across  
280 Mexico, as compared to other virus lineages. Again, this is likely to be associated with the establishment  
281 of a systematic viral genome sampling and sequencing following February 2021, further driven by the  
282 widespread expansion of the lineage throughout the country (**Figure 4**).

283 Phylodynamic analysis for B.1.617.2+ revealed a minimum number of 142 introduction events  
284 into Mexico (95% HPD interval = [125-148]). Within the MCC, six major clades denoting extended  
285 transmission chains were identified (C1d-C6d), with C1d, C3d, C5d and C6d being the largest (**Figure**  
286 **4, Supplementary file 2**). At least four independent introduction events were detected as the earliest  
287 (and synchronous) MRCAs, all dating to April 2021 (including the ancestral nodes of the C3d, C4d and  
288 C6d clades). Based on inferred node dates in the MCC tree, we report a total lineage persistence of  
289 seven months (up to November 30<sup>th</sup> 2021). C2d comprises 'Mexico' virus genomes assigned as AY.62,  
290 sampled mainly from the state of Yucatán. Clade C4d comprises genomes from Mexico assigned as  
291 AY.3, sampled mostly from the central and south of the country (JAL) (**Figure 4**). Of interest, the C1d  
292 and C3d clades represent two independent introduction and spread events of the AY.26 sub-lineage  
293 into the country. C1d comprises genomes from Mexico sampled from the north (>60%; BCS, SIN, JAL),

294 followed by central (CMX) and south-eastern states (VER, ROO and YUC) (**Figure 4**). The MRCA of  
295 the C1d dates to May 2021, denoting a clade persistence of six months (from May 2021 to November  
296 2021). Comparably, the C3d comprises genomes from Mexico mostly sampled from the north (37%;  
297 SIN, BCS and SON). Comparably, the MRCA of the C3d dates to April 2021, denoting a clade  
298 persistence of seven months (from April 2021 to November 2021) (**Figure 4**).

299 For the largest clades identified, C5d comprises viral genomes assigned as AY.100 (44%), to  
300 the parental B.1.617.2 (40%), and to the AY.113 (12%). Within this clade, we observe that the AY.100  
301 and B.1.617.2 genomes are separated by a central sub-cluster of AY.113-assigned genomes (**Figure**  
302 **4**). Approximately 70% of the genome sequences within C5d were sampled from Mexico (mostly  
303 assigned as AY.100 and AY.113), whilst 30% were sampled from the USA (mostly assigned as  
304 B.1.617.2). The majority of the 'Mexico' genomes are positioned basally and distally within the clade,  
305 sampled from all 32 states, but predominantly from north, centre and southern regions (>50%;  
306 represented by CHH, DUR, NLE, CMX, MEX, CAM, YUC, TAB, CHP and ROO) (**Figure 4**). Thus, the  
307 C5d represents the most genetically diverse and geographically widespread clade identified in Mexico.  
308 The MRCA of the C5d dates to May, denoting a clade persistence of up to six months (from May 2021  
309 to November 2021). C6d is the second largest clade identified, comprising viral genomes from Mexico  
310 assigned as AY.20, mostly collected from central region of the country (>60%; represented by CMX,  
311 MEX, MOR, MIC and HID) (**Figure 4**). Thus, contrasting to C5d, C6d denotes an extended transmission  
312 chain with a geographic distribution mainly restricted to central Mexico. The MRCA of the C6d clade  
313 dates to April, displaying a clade persistence of seven months (from April 2021 to November 2021).

314

### 315 **Spread of B.1.617.2**

316 Given the size and diversity of the C5d and C6 clades, we further explored viral diffusion patterns across  
317 the country using a phylogeographic approach (see Methods section 4). For the C5d clade, viral spread  
318 is likely to have occurred from the south (represented by the states of Chiapas and Campeche; CHP  
319 and CAM) into the rest of the country (**Figure 4 - video 1**). Well-supported transitions (scored under a  
320  $BF > 100$  and a  $PP > .90$ ) were mostly inferred from the southern state of Campeche (CAM) into central  
321 and northern states, and subsequently from the northern state of Chihuahua (CHH) into the central and  
322 northern region of the country, with some bidirectionality observed. Well-supported transitions were also  
323 observed from Baja California into Chihuahua (BCN/BCS into CHH), and from Chihuahua into the USA

324 (arbitrarily represented by the geographic coordinates of the state of California) (**Figure 4**).  
325 Contrastingly, for C6d, a limited viral spread was observed from central states (represented by Mexico  
326 City, CMX) into central, northern and southern regions of the country (again with some bidirectionality  
327 observed). Well-supported transitions were also inferred from the southern state of Chiapas into central  
328 and northern region of the country (**Figure 4 - video 2**). Bayes Factor (BF) and Posterior Probability  
329 (PP) for well-supported transitions observed between locations can be found as **Table 1**.

330

### 331 **Linking virus spread to human mobility data**

332 Our analysis on human mobility data derived from mobile phone usage (collected between January  
333 2020 and December 2021 at a national scale, see Methods section 5), revealed two mobility peaks  
334 across time (**Figure 1c**). The first occurred between February and April 2021, coinciding with the  
335 introduction and spread of the B.1.1.7 and P.1+ lineages, and with the contraction of B.1.1.519. The  
336 second mobility peak was observed between August and November 2021, coinciding with the  
337 expansion of the B.1.617.2 lineage. Increased human movement (represented by the cumulative  
338 number of trips into a given state) were observed for Mexico City, and to a lesser extent, for Jalisco, the  
339 State of Mexico, Nuevo León and Puebla (followed by Coahuila, Guanajuato and Veracruz) (**Figure**  
340 **1c**). Mean connectivity within national territory revealed intensified movements from Mexico City into  
341 the State of Mexico, Morelos, Hidalgo, Puebla, Veracruz and Jalisco, and from Jalisco into Michoacán  
342 and Guadalajara (**Figure 1 - figure supplement 2**). However, for both the C5d and C6d clades, no  
343 correlation between viral transitions and mean connectivity was observed (C5d: Adjusted R-squared:  
344 0.006577, F-statistic: 7.15 on 1 and 928 DF, p-value: 0.007628. C6d: Adjusted R-squared: 0.3216, F-  
345 statistic: 470.8 on 1 and 990 DF, p-value: < 2.2e-16), nor with the pairwise distance between states  
346 (C5d: Adjusted R-squared: 0.01086, F-statistic: 4.051 on 1 and 277 DF, p-value: 0.04511. C6d:  
347 Adjusted R-squared: 0.02296, F-statistic: 2.715 on 1 and 72 DF, p-value: 0.1038). Many of the lineage-  
348 specific clades we identify displayed a geographic distribution within southern region of the country (*i.e.*,  
349 clades C3a and C7 for B.1.1.7, clade C1\_P1\_17 for P.1, and clades C2d and C5d for B.1.617.2). In this  
350 context, ranking connectivity between the southern region of the country (represented by Yucatán,  
351 Quintana Roo, Chiapas and Campeche) and the remaining 28 states did reveal a consistently high  
352 number of bidirectional movements between regions (represented by the CAM, CMX and VER) (**Figure**  
353 **1 - figure supplement 2**).

354

## 355 **DISCUSSION**

356 Our results reveal contrasting epidemiological and evolutionary dynamics between virus lineages  
357 circulating in Mexico during the first year of the epidemic, with some identifiable patterns. Both the  
358 B.1.1.222 and B.1.1.519 lineages likely originated in Mexico, characterized by single clades denoting  
359 extended sustained transmission for over a year. During this time, both lineages dominated in Mexico,  
360 and were seeded back and forth between Mexico and the USA, but never dominated across the USA.  
361 Thus, the number of publicly available viral genomes from each country reflects sequencing disparities  
362 that contrast with the lineage-specific epidemiological patterns observed across regions, highlighting  
363 the need to leverage genomic surveillance efforts across neighbouring nations using joint strategies <sup>1</sup>.

364 Further similarities were observed for the P.1 and B.1.1.7 lineages, for which peaks in genome  
365 sampling frequencies coincided with a decrease in cases following the second wave of infection. We  
366 further confirm that P.1 and B.1.1.7 did not dominate in Mexico <sup>34,44</sup>, in contrast to what was observed  
367 in other countries such as the UK and USA <sup>23,45,56</sup>. Similar observations were independently made for  
368 other Latin American countries (some with better genome representation than others, like Brazil <sup>45</sup>),  
369 suggesting that the overall epidemiological dynamics of B.1.1.7 in Latin America may have differed  
370 substantially from that observed in the USA and UK <sup>23,45,56</sup>. Such differences could be explained partly  
371 by competition between lineages, exemplified in Mexico by the regional co-circulation of B.1.1.7, P.1  
372 and B.1.1.519. Nonetheless, a lack of representative number of viral genomes for most of these  
373 countries prevents exploring such hypothesis at a larger scale, and further highlights the need to  
374 strengthen genomic epidemiology-based surveillance. However, the overall evolutionary dynamics  
375 observed for these VOC are comparable to those reported in other countries <sup>23,45,56</sup>. As an example, in  
376 the USA, the earliest introductions reported for the B.1.1.7 lineage were synchronous to those observed  
377 in Mexico (occurring between October and November 2020), and were also characterized by a few  
378 extended transmissions chains with a distribution often constrained to specific states <sup>56</sup>. Thus, as drawn  
379 from our study, the successful spread of a given virus lineage does not seem to be linked to a higher  
380 number of introduction events, but rather to the extent and distribution of transmission chains, with size  
381 likely reflecting virus transmissibility <sup>57</sup>.

382 In Mexico, the introduction and spread of the B.1.1.7, P.1 and B.1.617.2 lineages was  
383 characterized by multiple introduction events, resulting in a few successful extended local transmission

384 chains. The epidemiological and evolutionary dynamics of the three VOC show that not only did these  
385 coincide temporally, but also revealed multiple and independent transmission chains corresponding to  
386 different lineages (and sub-lineages) spreading across the same geographic regions. Our results further  
387 revealed several clades belonging to different virus lineages distributed within the south region of the  
388 country, suggesting that this area has played a key role in the spread of SARS-CoV-2. Of notice, such  
389 pattern is comparable to what has been observed for arboviral epidemics in Mexico (Gutierrez et al, *in*  
390 *preparation*,<sup>58</sup>). Jointly, such observations indicate that the south region of Mexico (represented by the  
391 states of Chiapas, Yucatán and Quintana Roo) may be a common virus entry and seeding point,  
392 emphasising the need for an enhanced virus surveillance in these states that share borders with  
393 neighbouring countries in Central America, further highlighting the importance of devising tailored  
394 surveillance strategies applied to specific states (*i.e.*, sub region-specific surveillance).

395 In general, an increasing growth rate ( $R_t$ ; defined as the instantaneous reproductive number  
396 that measures how an infection multiplies<sup>59</sup>) observed for different SARS-CoV-2 lineages dominating  
397 across specific regions can be partially explained by a fluctuating virus genetic background (*i.e.*,  
398 emerging mutations that impact viral fitness)<sup>23,45,56</sup>. In light of our results, relative to the parental  
399 B.1.1.222 lineage, B.1.1.519 displayed only two amino acid changes within the Spike protein: T478K  
400 and P681H<sup>39</sup>. Mutation T478K locates within the Receptor Binding Domain (RBD), with a potential  
401 impact in antibody-mediated neutralization<sup>60,61</sup>. On the other hand, mutation P681H is located upstream  
402 the furin cleavage site, and falls within an epitope signal hotspot<sup>62</sup>. Thus, it may enhance virus entry<sup>63</sup>,  
403 reduce antibody-mediated recognition<sup>62</sup>, and confer Type I interferon resistance<sup>64</sup>. We speculate that  
404 at least one of these mutations may have contributed to the dominance of B.1.1.519 over B.1.1.222 by  
405 increasing the  $R_t$ , as has been observed for other SARS-CoV-2 subpopulations<sup>20,21,65</sup>. In agreement  
406 with this observation, in Mexico, an  $R_t$  of 2.9 was estimated for B.1.1.519 compared to an  $R_t$  of 1.93  
407 estimated for B.1.1.222 (both calculated during epidemic week 2020-46, coinciding with the early  
408 expansion of B.1.1.519 in the country)<sup>38</sup>.

409 Notably, the mutations observed for B.1.1.519 were not exclusive to the lineage, as P681H  
410 emerged later and independently in B.1.1.7 (and to a lesser extent in P.1, corresponding to 5% of all  
411 sampled genomes)<sup>66,67</sup>, whilst mutation T478K subsequently appeared in B.1.617.2<sup>60,63,64</sup>. Although  
412 assessing the impact of emerging mutations on lineage-specific fitness requires experimental  
413 validation, data derived from the natural virus population evidences amino acid changes at site 681 of



414 the Spike protein have been predominantly fixed in VOC, with some mutations likely to yield an  
415 evolutionary advantage <sup>60,63,64,68–70</sup>. Thus, we propose that a somewhat ‘shared’ genetic background  
416 between the B.1.1.519 and B.1.1.7 lineages (as represented by mutation P681H) may have limited the  
417 spread of B.1.1.7 across the country. In this context, our findings suggest that the specific dominance  
418 and replacement patterns observed in Mexico were driven (to some extent) by lineage-specific  
419 mutations impacting growth rate, with competition between virus lineages at a local scale playing an  
420 important role.

421 Nonetheless, lineage-specific replacement and dominance patterns are likely to be shaped by  
422 the immune landscape of the local host population <sup>71</sup>. In Mexico, relatively widespread and constant  
423 exposure levels to genetically similar virus subpopulations for extended periods of time (represented by  
424 the B.1.1.222 and B.1.1.519 lineages) may have yielded consistently increasing immunity levels in a  
425 somewhat still naïve population (with a nationwide seroprevalence of ~33.5% estimated by December  
426 2020 <sup>72,73</sup>). As more genetically divergent virus lineages were introduced and began to spread across  
427 the country (represented by B.1.1.7 and P.1, and later by B.1.617.2), a shift in the local immune  
428 landscape is likely to have occurred, impacted by a viral genetic background prompting (a partial)  
429 evasion of the existing immune responses. Supporting this observation, a vaccination rate of above  
430 50% was only reached after December 2021 <sup>29,74</sup>, suggesting that immunity levels during the first year  
431 of the epidemic mostly depended on virus pre-exposure levels.

432 In the context of human movement related to the spread of SARS-CoV-2 in Mexico, the  
433 fluctuating mobility patterns we observed for the country were consistent with a decrease in cases  
434 following the second and third waves of infection, likely reflecting changes in the colour-coded system  
435 regulating travel restrictions leveraged by the risk of infection <sup>75</sup>. However, contrasting to our  
436 expectations on viral diffusion processes to be associated with local human mobility patterns, the  
437 geographic distances and overall human mobility trends observed within Mexico did not correlate with  
438 the virus diffusion patterns inferred (represented by B.1.617.2). As geographic distances and human  
439 mobility cannot be considered potential predictors of SARS-CoV-2 spread in Mexico, viral diffusion  
440 could be explained (to some extent) by human movement across borders. Taking this into  
441 consideration, it has been proposed that the spread of SARS-CoV-2 in Mexico is linked to human  
442 mobility across USA (for example, see <sup>44</sup>), as we further evidence in this study by the transmission  
443 patterns observed for the B.1.1.222 and the B.1.1.519 lineages at an international scale. However,

444 some of the virus diffusion patterns we observed are also congruent with human migration routes from  
445 South and Central America, supporting the notion that SARS-CoV-2 spread in Mexico has been  
446 impacted by epidemics within neighbouring regions, and further underlines the need to investigate the  
447 potential role of irregular migration on virus spread across geographic regions <sup>76–79</sup>.

448       Limitations of our study include uncertainty in determining source locations for virus introduction  
449 events into the country (for most lineages), restricted by regional genome sampling biases <sup>80,81</sup>. This is  
450 further impacted by *i*) an uneven genome sampling across foreign locations and within the country, and  
451 *ii*) by a poor viral genome representation for many countries in Central and South America <sup>49,82</sup>. Such  
452 biases are also likely to affect the viral diffusion reconstructions we present, likely rendering them  
453 incomplete. However, as SARS-CoV-2 genome sampling and sequencing in Mexico has been  
454 sufficient, we are still able to robustly quantify and characterize lineage-specific transmission chains. It  
455 is worth highlighting that a differential proportion of cumulative viral genomes sequenced per state does  
456 not necessarily mirror the geographic distribution and extension of the transmission chains identified,  
457 but rather represents a fluctuating intensity in virus genome sampling and sequencing through time.  
458 Thus, a more homogeneous sampling across the country is unlikely to impact our main findings, but  
459 could *i*) help pinpoint additional clades we are currently unable to detect, *ii*) provide further details on  
460 the geographic distribution of clades across other regions of the country, and *iii*) deliver a higher  
461 resolution for the viral spread reconstructions we present. Overall, our study prompts the need to better  
462 understand the impact of land-based migration across national borders, and encourages joint virus  
463 surveillance efforts in the Americas.

464

## 465 **METHODS**

### 466 **1. Data collation and initial sequence alignments**

467 Global genome datasets assigned to each ‘Pango’ <sup>11</sup> lineage under investigation (B.1.1.222, B.1.1.519,  
468 B.1.1.7, P.1 and B.1.617.2) were downloaded with associated metadata from the GISAID platform  
469 (<https://www.gisaid.org/>) as of November 30<sup>th</sup> 2021 <sup>49,83</sup>. The total number of sequences retrieved for  
470 each virus lineage were the following: B.1.1.222 = 3,461, B.1.1.519 = 19,246, B.1.1.7 = 913,868, P.1 =  
471 87,452, and B.1.617.2 = 2,166,874. These also included all SARS-CoV-2 genomes from Mexico  
472 available up the sampling date of this study, generated both by CoViGen-Mex and by other national  
473 institutions. Viral genome sequences were quality filtered to be excluded if presenting incomplete

474 collection dates, if >1000 nt shorter than full genome length, and/or if showing >10% of sites coded as  
475 ambiguities (including N or X). Individual datasets were further processed using the Nextclade pipeline  
476 to filter according to sequence quality <sup>84</sup>. In addition, a set of the earliest SARS-CoV-2 sequences  
477 sampled from late 2019 to early 2020 (including reference sequence Wuhan-Hu-1, GenBank accession  
478 ID: MN908947.3), and a set of viral genomes representing an early virus diversity sampled up to  
479 31/05/2020 were added for rooting purposes ([https://github.com/BernardoGG/SARS-CoV-2\\_Genomic\\_lineages\\_Ecuador](https://github.com/BernardoGG/SARS-CoV-2_Genomic_lineages_Ecuador)). To generate whole genome alignments, datasets were mapped to the  
481 reference sequence Wuhan-Hu-1 (GenBank: MN908947.3) using Minimap2 <sup>85</sup>. Then, the main viral  
482 ORFs (Orf1ab and S) were extracted to generate reduced-length alignments of approximately 25,000  
483 bases long, comprising only the largest and most phylogenetically informative coding genome regions  
484 (excluding smaller ORFs, UTRs, and short intergenic sequences).

485

## 486 **2. Migration data and phylogenetically-informed subsampling**

487 To provide an overview for global introductory events into Mexico as a proxy for dataset reduction, we  
488 used openly available data describing anonymized relative human mobility flow into different  
489 geographical regions based on mobile data usage <sup>86,87</sup> ([https://migration-demography-  
490 tools.jrc.ec.europa.eu/data-hub/index.html?state=5d6005b30045242cabd750a2](https://migration-demography-tools.jrc.ec.europa.eu/data-hub/index.html?state=5d6005b30045242cabd750a2)). For any given  
491 dataset, all 'non-Mexico' sequences were sorted according to their location, selecting only the top 5  
492 countries representing the most intense human mobility flow into Mexico. In the case reported sub-  
493 lineages, the subsampled datasets were further reduced by selecting the top 5 sub-lineages that  
494 circulate(d) in the country. The 'Mexico' genome sets were then subsampled to ~4,000 in proportion to  
495 the total number of cases reported across time (corresponding to the epidemiological weeks from  
496 publicly accessible epidemiological data from the country <sup>88</sup>). This yielded datasets of a maximum of  
497 8,000 genomes, with an approximate 1:1 ratio of 'Mexico' to 'globally sampled' viral genomes (keeping  
498 those corresponding to the earliest and latest collection dates, sampled both from Mexico and globally).  
499 Preliminary Maximum Likelihood (ML) trees were then inferred using IQ-TREE (command line: `iqtree -  
500 s -m GTR+I+G -alrt 1000`) <sup>89</sup>.

501 Phylogenetically-informed subsampling is based on maintaining basic clustering patterns,  
502 whilst reducing the noise derived from overrepresented sequences. This approach was applied to the  
503 ML trees resulting from the abovementioned migration-informed subsampled datasets, by using a

504 modified version of Treemmer v0.3 (<https://github.com/fmenardo/Treemmer/releases>) to reduce the  
505 size and redundancy within the trees with a minimal loss of diversity<sup>90</sup>. For this, the -lm command was  
506 initially used to protect 'Mexico' sequences and those added for rooting purposes. During the pruning  
507 iterations, the -pp command was used to protect 'Mexico' clusters and pairs of 'non-Mexico' sequences  
508 that are immediately ancestral or directly descending from these. This rendered reduced-size  
509 representative datasets that enable local computational analyses. As a note, clades may appear to be  
510 smaller relative to the raw counts of genomes publicly available, but actually reflect the sampled viral  
511 genetic diversity. Datasets were then used to re-estimate the ML trees, and used as input for time-  
512 scaled phylogenetic analysis (see Methods section 4). Our subsampling pipeline is publicly accessible  
513 at ([https://github.com/rhysinward/Mexico\\_subsampling](https://github.com/rhysinward/Mexico_subsampling)).

514 We further sought to validate our migration-informed genome subsampling scheme (applied to  
515 B.1.617.2+, representing the best sampled lineage in Mexico). For this, an independent dataset was  
516 built using a different migration sub-sampling approach, comprising all countries represented by  
517 B.1.617.2+ sequences deposited in GISAID (available up to November 30<sup>th</sup> 2021). In order to compare  
518 the number of introduction events, the new dataset was analysed independently under a time-scaled  
519 DTA (as described in Methods Section 4). The distribution plots for each genome dataset before and  
520 after applying our migration- and phylogenetically-informed subsampling pipeline, and a full description  
521 of the approach employed to validate our migration-informed subsampling is available as **Appendix 1**.

522

### 523 **3. Dataset assembly for initial phylogenetic inference**

524 Given the reduced size of the original B.1.1.222 dataset, all sequences retained after initial quality  
525 filtering were used for further analyses. This resulted in a 3,849-sequence alignment (including 760  
526 genomes from Mexico). All other datasets (B.1.1.519, B.1.1.7, P.1 and B.1.617.2) were processed  
527 under the pipeline described (in Methods section 2) to render informative datasets for phylogeographic  
528 analysis. The B.1.1.519 final dataset resulted in a 5,001-sequence alignment, including 2,501 genomes  
529 from Mexico. The B.1.1.7 final dataset resulted in a 7,049-sequence alignment, including 1,449  
530 genomes from Mexico. The P.1 final dataset resulted in a 5,493-sequence alignment, including 2,570  
531 genomes from Mexico. The B.1.617.2 final dataset resulted in a 5,994-sequence alignment, including  
532 3,338 genomes from Mexico. All genome sequences used are publicly available and are listed in

533 **Supplementary file 1.** Individual datasets were then used for phylogenetic inference as described  
534 above, with the resulting trees inputted for a time-scaled analyses.

535

#### 536 **4. Time-scaled analysis**

537 Output ML trees were assessed for temporal signal using TempEst v1.5.3<sup>91</sup>, removing outliers and re-  
538 estimating trees when necessary. The resulting trees were then time-calibrated informed by tip sampling  
539 dates using TreeTime<sup>92</sup> (command line: `treetime -aln --tree --clock-rate 8e-4 --dates --keep-polytomies`  
540 `--clock-filter 0`). Due to a low temporal signal, a fixed clock rate corresponding to the reported viral  
541 evolutionary rate estimated ( $8 \times 10^{-4}$  substitutions per site per year) was used<sup>93,94</sup>. Root-to-tip regression  
542 plots for the ML trees (prior to time calibration, and excluding rooting sequences) show a weak temporal  
543 signal, and support the use of a fixed molecular clock rate ( $8 \times 10^{-4}$ ) for the temporal calibration of  
544 phylogenetic trees (**Figures 2 - 4**).

545 To further quantify lineage-specific 'introduction events' into Mexico and characterize clades  
546 denoting local extended transmission chains, the time-calibrated trees were used as input for a discrete  
547 trait analysis (DTA, or 'discrete phylogeographic inference'), using BEAST v1.10.4 to generate  
548 maximum clade credibility (MCC) trees<sup>95-97</sup>. A DTA approach was suitable for all cases, as only a few  
549 discrete locations relatively well sampled across time were considered<sup>97</sup>. Using fixed 'time-calibrated'  
550 trees as an input for the DTA is an effective way of circumventing the restrictions of computationally-  
551 expensive analyses on large datasets<sup>95</sup>. Although this approach allows to infer dated introduction  
552 events into the study area, it does not consider phylogenetic uncertainty. Thus, the most recent common  
553 ancestor 'MRCA' dates we report come without credibility intervals. For all introduction events identified,  
554 the mean and associated HPD interval were assessed. Following a similar strategy as described in du  
555 Plessis et al.<sup>3</sup> 'Mexico' clades were identified as those composed by a minimum of two sister 'Mexico'  
556 viral genome sequences directly descending from another 'Mexico' sequence. Extended local  
557 transmission chains were identified as clades composed by >20 viral genome sequences, with at least  
558 80% of these sampled from Mexico, and with ancestral nodes supported by a PP value of >.80. Based  
559 on the MCC trees, we further estimated 'total persistence' times for the lineages studied, defined as the  
560 'interval of time elapsed between the first and last inferred introduction events associated with the  
561 MRCA of any given clade from Mexico'. On the other hand, the lag between the earliest introduction

562 event (MRCA) and the earliest sampling date for any given lineage corresponds to a 'cryptic  
563 transmission' period.

564 For the B.1.1.7, P.1 and B.1.617.2 datasets, analyses were performed to estimate the number  
565 of transitions into Mexico from other (unknown) geographic regions. Thus, two locations were  
566 considered: 'Mexico' and 'other'. For the B.1.1.222 and B.1.1.519 datasets, we estimated the number  
567 of transitions between Mexico and the USA, based on the fact both these lineages were considered  
568 endemic to North America (with >90% of the virus genomes sampled from the USA and Mexico)<sup>36</sup>. For  
569 this cases, three distinct geographic locations were considered: 'Mexico', 'USA' and 'other'. The 'most  
570 likely' locations for lineage emergence were further obtained by comparing relative posterior  
571 probabilities (PP) between inferred ancestral locations for the given TMRCAs<sup>95–97</sup>. For all analyses,  
572 independent Monte Carlo Markov Chain (MCMC) were run for 10<sup>6</sup> iterations, sampling every 10<sup>3</sup> states.  
573 To assess for sufficient effective sample size values (*i.e.*, ESS>200) associated with the estimated  
574 parameters, we inspected MCMC convergence and mixing using Tracer 1.7<sup>98</sup>. In the case of B.1.617.2,  
575 we further explored viral diffusion patterns across the country by running two additional DTAs applied  
576 to the largest monophyletic clades identified within the MCC tree (C5d and C6d). For this, we used 33  
577 distinct sampling locations (including all 32 states from Mexico, plus an 'other' location, referring to viral  
578 genomes sampled from outside the country). Visualization of the viral diffusion patterns was performed  
579 using SpreadViz (<https://spreadviz.org/home>), an updated web implementation of the Spatial  
580 Phylogenetic Reconstruction of Evolutionary Dynamics software SpreaD3<sup>99</sup>. In order to identify well-  
581 supported transitions between locations<sup>97</sup>, SpreadViz was also further used to estimate Bayes Factor  
582 (BF) values.

583

## 584 **5. Human mobility data analysis and exploring correlations with genomic data**

585 Human mobility data used for this study derived from anonymized mobile device locations collected  
586 between 01/01/2020 and 31/12/2021 within national territory, made available by the company Veraset  
587<sup>100</sup>. The source dataset includes anonymized identifiers for mobile devices, geographical coordinates  
588 (latitude and longitude) and a timestamp. The dataset was used to construct aggregated inter-state  
589 mobility networks, where nodes are defined as each of the 32 states from the country, whilst (weighed  
590 and directed) edges represent the normalized volume of observed trips between nodes<sup>100</sup>. The resulting  
591 networks were then used to quantify the number of cumulative trips from any state into a given specific

592 state across time, the geographic distances among states, the mean inter-state connectivity observed  
593 between April 2021 and November 2021 (corresponding to the expansion period for the B.1.617.2  
594 lineage, see **Figure 4b, Supplementary file 3**), and finally, for ranking connectivity between the south  
595 region of the country (represented by the states of Yucatán, Quintana Roo, Chiapas and Campeche)  
596 and the remaining 28 states (**Supplementary file 3**). The connectivity measure was defined as the sum  
597 of the weights for edges that go from any given node into other node(s), reflecting the number of trips  
598 in any direction. We then used the 'PhyCovA' software tool ([https://evolcompvir-  
599 kuleuven.shinyapps.io/PhyCovA/](https://evolcompvir-kuleuven.shinyapps.io/PhyCovA/)) to perform preliminary analysis for exploring the human mobility data  
600 from the country as a potential predictor of viral transition among locations <sup>101</sup>. 'PhyCovA' was chosen  
601 as an explanatory approach over a fully-integrated GLM implemented in the Bayesian BEAST  
602 framework, as the last one would imply a high computational burden related to our datasets <sup>96</sup>.

603

#### 604 **DATA AVAILABILITY**

605 Virus genome IDs and GISAID accession numbers for the sequences used in each dataset are provided  
606 in the **Supplementary file 1**. All genomic and epidemiological data supporting the findings of this study  
607 is publicly available from GISAID/GenBank, from the Ministry Of Health Mexico<sup>102</sup>, and/or from the 'Our  
608 World in Data' coronavirus pandemic web portal <sup>29</sup>. For the GISAID data used, the corresponding  
609 acknowledgement table is available on the 'GISAID Data Acknowledgement Locator' under the  
610 EPI\_SET\_20220405qd and EPI\_SET\_20220215at keys <sup>49</sup>. Our bioinformatic pipeline implementing a  
611 migration data and phylogenetically-informed sequence subsampling approach is publicly available at  
612 [https://github.com/rhysinward/Mexico\\_subsampling](https://github.com/rhysinward/Mexico_subsampling).

613

#### 614 **COMPETING INTERESTS**

615 The authors declare no competing interests.

616

#### 617 **ACKNOWLEDGEMENTS**

618 HGCS is supported by funding through the "Vigilancia Genómica del Virus SARS-CoV-2 en México"  
619 grant from the National Council for Science and Technology-México (CONACyT). SD acknowledges  
620 support from the *Fonds National de la Recherche Scientifique* (F.R.S.-FNRS, Belgium; grant  
621 n°F.4515.22), from the Research Foundation - Flanders (*Fonds voor Wetenschappelijk Onderzoek-*

622 *Vlaanderen*, FWO, Belgium; grant n°G098321N), and from the European Union Horizon 2020 project  
623 MOOD (grant agreement n°874850). MEZ is currently supported by Leverhulme Trust ECR Fellowship  
624 (ECF-2019-542). OGP acknowledges support of the Oxford Martin School. MK and RPDI acknowledge  
625 support from the European Union Horizon 2020 project MOOD (#874850). The contents of this  
626 publication are the sole responsibility of the authors and do not necessarily reflect the views of the  
627 European Commission. The mobility team [MHR, AM, OF, MF, PG, GO, GAJ] and AHE are supported  
628 by 'Fondo Conjunto de Cooperación México-Uruguay' (Agencia Mexicana de Cooperación  
629 Internacional para el Desarrollo). CFA acknowledges support from grants "Vigilancia Genómica del  
630 Virus SARS-CoV-2 en México-2022" (PP-F003) from the National Council for Science and Technology-  
631 México (CONACyT), grant 057 from the "Ministry of Education, Science, Technology and Innovation  
632 (SECTEI) of Mexico City", and grant "Genomic surveillance for SARS-CoV-2 variants in Mexico" from  
633 the AHF Global Public Health Institute at the University of Miami. AL work was supported by DGAPA-  
634 PAPIIT (IN214421) and DGAPA-PAPIME (PE204921) of UNAM. We thank Verity Hill, Philippe Lemey,  
635 Tim Blokker and Sam Hong for their valuable advice on the technical details related to the methodology  
636 used for the time-scaled analyses. We thank all members of the Consorcio Mexicano de Vigilancia  
637 Genómica (CoViGen-Mex) for their efforts on sample collection and generating genetic sequence and  
638 metadata. Particularly, we thank León Martínez-Castilla and José Campillo Balderas for their  
639 contributions in the initial collation of preliminary data. We gratefully acknowledge all data contributors  
640 for the GISAID sequence data: *i.e.* the authors and their originating laboratories responsible for  
641 obtaining the specimens, and their submitting laboratories for generating the genetic sequence and  
642 metadata and sharing via the GISAID initiative, on which this research is based.



**Table 1.** Bayes Factor (BF) and Posterior Probability (PP) for well-supported transitions observed between locations\*

| C5d      |       |             |             | C6d      |       |             |             |
|----------|-------|-------------|-------------|----------|-------|-------------|-------------|
| Location |       |             |             | Location |       |             |             |
| From     | To    | BFR         | PP          | From     | To    | BFR         | PP          |
| BCN      | CHH   | 14535.32494 | 1           | AGU      | CHP   | 13635.15617 | 1           |
| CAM      | CHP   | 14535.32494 | 1           | BCN      | CHP   | 13635.15617 | 1           |
| CAM      | CMX   | 14535.32494 | 1           | CHP      | CMX   | 13635.15617 | 1           |
| CAM      | MEX   | 14535.32494 | 1           | CHP      | COA   | 13635.15617 | 1           |
| CAM      | MIC   | 14535.32494 | 1           | CHP      | DUR   | 13635.15617 | 1           |
| CAM      | other | 14535.32494 | 1           | CHP      | GRO   | 13635.15617 | 1           |
| CAM      | QUE   | 14535.32494 | 1           | CHP      | GUA   | 13635.15617 | 1           |
| CAM      | ROO   | 14535.32494 | 1           | CHP      | HID   | 13635.15617 | 1           |
| CAM      | SLP   | 14535.32494 | 1           | CHP      | JAL   | 13635.15617 | 1           |
| CAM      | SON   | 14535.32494 | 1           | CHP      | MEX   | 13635.15617 | 1           |
| CAM      | TAB   | 14535.32494 | 1           | CHP      | MIC   | 13635.15617 | 1           |
| CAM      | TAM   | 14535.32494 | 1           | CHP      | NLE   | 13635.15617 | 1           |
| CAM      | TLA   | 14535.32494 | 1           | CHP      | OAX   | 13635.15617 | 1           |
| CAM      | VER   | 14535.32494 | 1           | CHP      | other | 13635.15617 | 1           |
| CAM      | ZAC   | 14535.32494 | 1           | CHP      | PUE   | 13635.15617 | 1           |
| CMX      | CHH   | 14535.32494 | 1           | CHP      | QUE   | 13635.15617 | 1           |
| CHH      | CHP   | 14535.32494 | 1           | CHP      | SIN   | 13635.15617 | 1           |
| CHH      | CMX   | 14535.32494 | 1           | CHP      | SLP   | 13635.15617 | 1           |
| CHH      | DUR   | 14535.32494 | 1           | CHP      | SON   | 13635.15617 | 1           |
| CHH      | GUA   | 14535.32494 | 1           | CHP      | TAB   | 13635.15617 | 1           |
| CHH      | MIC   | 14535.32494 | 1           | CHP      | TLA   | 13635.15617 | 1           |
| CHH      | NLE   | 14535.32494 | 1           | CHP      | VER   | 13635.15617 | 1           |
| CHH      | QUE   | 14535.32494 | 1           | CAM      | CHP   | 13635.15617 | 0.998890122 |
| CHH      | TAB   | 14535.32494 | 1           | NLE      | TAB   | 13635.15617 | 0.998890122 |
| CHH      | TAM   | 14535.32494 | 1           | CHP      | TAM   | 6810.002999 | 0.997780244 |
| CHH      | VER   | 14535.32494 | 1           | CHP      | YUC   | 2714.911095 | 0.99445061  |
| CHH      | ZAC   | 14535.32494 | 1           | MEX      | PUE   | 164.4591205 | 0.915649279 |
| CAM      | CMX   | 14535.32494 | 0.998890122 |          |       |             |             |
| CHH      | TLA   | 14535.32494 | 0.998890122 |          |       |             |             |
| CAM      | SIN   | 3621.718465 | 0.995560488 |          |       |             |             |
| BCS      | CHH   | 1023.240732 | 0.984461709 |          |       |             |             |
| MIC      | YUC   | 468.8988157 | 0.966703663 |          |       |             |             |
| CHH      | other | 399.6060762 | 0.961154273 |          |       |             |             |
| CAM      | COA   | 188.7999953 | 0.921198668 |          |       |             |             |
| MEX      | YUC   | 126.5111615 | 0.886792453 |          |       |             |             |

\*derived from the phylogeographic analyses for C5d and C6d (B.1.617.2+). Only values of BF>100 and PP>.9 are shown.

## FIGURES LEGENDS

### Figure 1. Overview of the SARS-CoV-2 epidemic in Mexico

(a) Time-scaled phylogeny of representative SARS-CoV-2 genomes from Mexico within a global context, highlighting the phylogenetic positioning of B.1.1.222, B.1.1.519, B.1.1.7, P.1 and B.1.617.2 sequences. Lineage B.1.1.222 is shown in light green, B.1.1.519 in yellow, P.1 in red (Gamma), B.1.1.7 (Alpha) in dark green, and B.1.617.2 (Delta) in teal (b) The epidemic curve for COVID-19 in Mexico from January 2020 up to November 2021, showing the average number of daily cases (red line) and associated excess mortality (represented by a punctuated grey curve, denoting weekly average values). The peak of the first (July 2020), the second (January 2021), and the third wave (August 2021) of infection are highlighted in yellow shadowing. The dashed red line corresponds to the start date national vaccination campaign (December 2020), whilst the dashed black line represents the implementation date of a systematic genome sampling and sequencing scheme for the surveillance of SARS-CoV-2 in Mexico (February 2021). The period for the implementation of non-pharmaceutical interventions at national scale is highlighted in grey shadowing. The lower panel represents the genome sampling frequency (defined here as the proportion of viral genomes assigned to a specific lineage, relative to the proportion of viral genomes assigned to any other virus lineage in a given time point) of dominant virus lineages detected in the country during the first year of the epidemic. Lineages displaying a lower sampling frequency are jointly shown in purple. (c) Heatmap displaying the volume of trips into a given state from any other state recorded from January 2020 up to November 2021 derived from anonymized mobile device geolocated and time-stamped data.

### Figure 2. Time-scaled phylogenetic analyses for the B.1.1.222 and B.1.1.519 lineage

Maximum clade credibility (MCC) trees for the (a) B.1.1.222 and (b) B.1.1.519 lineages, in which clades corresponding to distinct introduction events into Mexico are highlighted. Nodes shown as red outline circles correspond to the most recent common ancestor (MRCA) for clades representing independent re-introduction events into Mexico (in teal) or from the USA (in ochre). Based on the earliest and latest MRCAs, the estimated circulation period for each lineage is highlighted in yellow shadowing. The dashed purple line represents the date of the earliest viral genome sampled from Mexico, while its position in the tree indicated. The dashed yellow line represents the implementation date of a systematic virus genome sampling and sequencing scheme for the surveillance of SARS-CoV-2 in Mexico. The corresponding root-to-tip regression plots for each tree are shown, in which genomes sampled from Mexico are shown in blue, whilst genomes sampled elsewhere are shown in grey. Map graphs on the left show the cumulative proportion of genomes sampled across states per lineage of interest, corresponding to the period of circulation of the given lineage (relative to the total number of genomes taken from GISAID, corresponding to raw data before subsampling). Maps on the right represent the geographic distribution of the clades identified.

### Figure 3. Time-scaled phylogenetic analyses for the B.1.1.7 and P.1 lineages

Maximum clade credibility (MCC) trees for the (a) B.1.1.7 and the (b) P.1 lineages, in which major clades identified as distinct introduction events into Mexico are highlighted. Nodes shown as red outline circles correspond to the most recent common ancestor (MRCA) for clades representing independent introduction events into Mexico. Based on the earliest and latest MRCAs, the estimated circulation period for each lineage is highlighted in yellow shadowing. The dashed purple line represents the date of the earliest viral genome sampled from Mexico, while its position in the tree indicated. The dashed yellow line represents the implementation date of a systematic virus genome sampling and sequencing scheme for the surveillance of SARS-CoV-2 in Mexico. The corresponding root-to-tip regression plots for each tree are shown, in which genomes sampled from Mexico are shown in blue, whilst genomes sampled elsewhere are shown in grey. Map graphs on the left show the cumulative proportion of genomes sampled across states per lineage of interest, corresponding to the period of circulation of the given lineage (relative to the total number of genomes taken from GISAID, corresponding to raw data before subsampling). Maps on the right represent the geographic distribution of the clades identified.

### Figure 4. Time-scaled and phylogeographic analysis for the B.1.617.2 lineage

Maximum clade credibility (MCC) tree for the B.1.617.2 lineage, in which major clades identified as distinct introduction events into Mexico are highlighted. Nodes shown as red outline circles correspond to the most recent common ancestor (MRCA) for clades representing independent introduction events into Mexico. Based on the earliest and latest MRCAs, the estimated circulation period for each lineage is highlighted in yellow shadowing. The dashed purple line represents the date of the earliest viral genome sampled from Mexico, while its position in the tree is indicated. The dashed yellow line

represents the implementation date of a systematic virus genome sampling and sequencing scheme for the surveillance of SARS-CoV-2 in Mexico. The corresponding root-to-tip regression plot for the tree is shown, in which genomes sampled from Mexico are shown in blue, whilst genomes sampled elsewhere are shown in grey. The map graph on the left shows the cumulative proportion of genomes sampled across states per lineage of interest, corresponding to the period of circulation of the given lineage (relative to the total number of genomes taken from GISAID, corresponding to raw data before subsampling). The map on the right represents the geographic distribution of the main clades identified (for further details see Supplementary file 2). On the right, a zoom-in to the C5d and C6d clades showing sub-lineage composition with the most likely location estimated for each node. Geographic spread across Mexico inferred for these clades is further represented on the maps on the right, derived from a discrete phylogeographic analysis (DTA, see Methods section 4). Viral transitions between Mexican states are represented by curved lines coloured according to sampling location, showing only well-supported transitions (Bayes Factor >100 and a PP >0.9) (see Table 1).

## SUPPLEMENT LEGENDS

### Figure 1- figure supplement 1. Cumulative number of genome sequences generated per state (data available up to March 2022)

(a) A significant correlation between the cumulative number of cases per state versus the number of viral genome sequences available per state is observed, indicating the estimated Spearman/Pearson coefficients and associated 95% confidence intervals (CI). Mexico City (CMX) displays the highest number of genomes sequenced relative to the reported number of cases. (b) A comparison between the total number of genomes sequenced from Mexico City (CMX) assigned to the lineages of interest plotted against collection date, and the number of daily cases reported for Mexico City (CMX) with symptom onset dates ranging from July 2020 up to November 2021 (coloured according to the year of sample collection). The dashed black line represents the implementation date of a broader viral genome sampling and sequencing scheme for the surveillance of SARS-CoV-2 in Mexico (February 2021). (c) The cumulative proportion of genome sequences generated per state across time (data from February 2020 up to November 2021). The states that generated a proportion of genome sequences above 0.50 (represented by a dashed grey line, relative to other states) are indicated: Mexico City (CMX-grey), State of Mexico (MEX-light blue), Yucatan (YUC-red) and Baja California Norte (BCN-dark green). Once more, the dashed black line represents the implementation date of a broader viral genome sampling and sequencing scheme for the surveillance of SARS-CoV-2 in Mexico (February 2021).

### Figure 1- figure supplement 2. Mean interstate connectivity recorded between 2021 and 2022

(a) Map graph showing the mean intra-state connectivity recorded within national territory, derived from anonymized mobile device locations collected between 01/01/2020 and 31/12/2021. Values above  $4E4$  are indicated using a colour gradient, whilst arrow thickness within the map represents the total number of bidirectional movements between states. (b) Maps graphs showing the mean inter-state connectivity between the southern region of the country (represented by the states of Yucatán, Quintana Roo, Chiapas and Campeche) and the remaining 28 states (recorded between 01/01/2020 and 31/12/2021). Again, values above  $10^4$  are indicated using a colour gradient, whilst arrow thickness within the map represents the total number of bidirectional movements between states.

### Figure 3- figure supplement 1. Largest 'Mexico' clades within the B.1.1.7 MCC tree

Zoom-in on the C3a and C7a clades identified as the largest within the B.1.1.7 MCC tree. Branch sampling locations are indicated only for sub-clusters composed of >5 sequences. The C3a clade is composed of 254 genome sequences sampled from 22/32 states in the country, mostly from Mexico City (CMX) and State of Mexico (MEX). Clade C7a is composed of 364 genome sequences, sampled mostly from the southern state of Tabasco (TAB). For details of all genome sequences within each clade see Supplementary file 2.

### Figure 3- figure supplement 2. Largest 'Mexico' clades within the P.1+ MCC tree

Zoom-in on the C1\_P1 and C1\_P1\_17 clades, identified as the largest within the P.1+ MCC tree. Branch sampling locations are indicated for large sub-clusters composed of >5 sequences. The C1\_P1 clade is composed of 277 genome sequences, mostly sampled from the central region of Mexico City (CMX). The C1\_P1\_17 clade is composed of 588 genome sequences, mostly sampled from the southern states of Quintana Roo (ROO) and Yucatán (YUC). For details of all genome sequences within each clade see Supplementary file 2.

**Video 1.** Animated visualizations of the spread pattern inferred for the C5d clade across Mexico derived from the DTA phylogeographic analysis.

**Video 2.** Animated visualizations of the spread pattern inferred for the C6d clade across Mexico derived from the DTA phylogeographic analysis.

**Supplementary file 1**

Virus genome IDs and GISAID accession numbers for the sequences used in each dataset

**Supplementary file 2**

Full list of names of all genome sequences within each major clade identified for each virus lineage

**Supplementary file 3**

Mobility matrixes summarizing: 1. Ranking connectivity between the southern region of the country, 2. Pairwise distances between states, 3. Mean intrastate connectivity

## REFERENCES

1. Hill, V., Ruis, C., Bajaj, S., Pybus, O. G. & Kraemer, M. U. G. Progress and challenges in virus genomic epidemiology. *Trends Parasitol.* **37**, 1038–1049 (2021).
2. Kraemer, M. U. G. *et al.* Spatiotemporal invasion dynamics of SARS-CoV-2 lineage B.1.1.7 emergence. *Science* **373**, 889–895 (2021).
3. du Plessis, L. *et al.* Establishment and lineage dynamics of the SARS-CoV-2 epidemic in the UK. *Science* **371**, 708–712 (2021).
4. Worobey, M. *et al.* The emergence of SARS-CoV-2 in Europe and North America. *Science* **370**, 564–570 (2020).
5. Candido, D. S. *et al.* Evolution and epidemic spread of SARS-CoV-2 in Brazil. *Science* **369**, 1255–1260 (2020).
6. COVID-19 Genomics UK (COG-UK) consortiumcontact@cogconsortium.uk. An integrated national scale SARS-CoV-2 genomic surveillance network. *Lancet Microbe* **1**, e99–e100 (2020).
7. Chen, Z. *et al.* A global analysis of replacement of genetic variants of SARS-CoV-2 in association with containment capacity and changes in disease severity. *Clin. Microbiol. Infect.* **27**, 750–757 (2021).
8. Li, J., Lai, S., Gao, G. F. & Shi, W. The emergence, genomic diversity and global spread of SARS-CoV-2. *Nature* **600**, 408–418 (2021).
9. Tao, K. *et al.* The biological and clinical significance of emerging SARS-CoV-2 variants. *Nat. Rev. Genet.* **22**, 757–773 (2021).
10. Tracking SARS-CoV-2 variants. <https://www.who.int/en/activities/tracking-SARS-CoV-2-variants/>.
11. Rambaut, A. *et al.* A dynamic nomenclature proposal for SARS-CoV-2 lineages to assist genomic epidemiology. *Nat Microbiol* **5**, 1403–1407 (2020).
12. Pango Network – Helping track the transmission and spread of SARS-CoV-2. <https://www.pango.network/>.
13. CDC. Science brief: Emerging SARS-CoV-2 variants. *Centers for Disease Control and Prevention* [https://www.cdc.gov/coronavirus/2019-ncov/science/science-briefs/scientific-brief-emerging-variants.html?CDC\\_AA\\_refVal=https://www.cdc.gov/coronavirus/2019-ncov/more/science-and-research/scientific-brief-emerging-variants.html](https://www.cdc.gov/coronavirus/2019-ncov/science/science-briefs/scientific-brief-emerging-variants.html?CDC_AA_refVal=https://www.cdc.gov/coronavirus/2019-ncov/more/science-and-research/scientific-brief-emerging-variants.html) (2022).
14. Horby, P. *et al.* [https://assets.publishing.service.gov.uk/government/uploads/system/uploads/attachment\\_data/file/961037/NERVTAG\\_no\\_te\\_on\\_B.1.1.7\\_severity\\_for\\_SAGE\\_77\\_1\\_.pdf](https://assets.publishing.service.gov.uk/government/uploads/system/uploads/attachment_data/file/961037/NERVTAG_no_te_on_B.1.1.7_severity_for_SAGE_77_1_.pdf).
15. Weisblum, Y. *et al.* Escape from neutralizing antibodies by SARS-CoV-2 spike protein variants. *Elife* **9**, e61312 (2020).
16. Greaney, A. J. *et al.* Mapping mutations to the SARS-CoV-2 RBD that escape binding by different classes of antibodies. *Nat. Commun.* **12**, 4196 (2021).
17. Greaney, A. J. *et al.* Complete mapping of mutations to the SARS-CoV-2 spike receptor-binding domain that escape antibody recognition. *Cell Host Microbe* **29**, 44–57.e9 (2021).
18. Classification of Omicron (B.1.1.529): SARS-CoV-2 variant of Concern. [https://www.who.int/news/item/26-11-2021-classification-of-omicron-\(b.1.1.529\)-sars-cov-2-variant-of-concern](https://www.who.int/news/item/26-11-2021-classification-of-omicron-(b.1.1.529)-sars-cov-2-variant-of-concern).
19. Cov-lineages. <https://cov-lineages.org/>.
20. Martin, D. P. *et al.* The emergence and ongoing convergent evolution of the N501Y lineages coincides with a major global shift in the SARS-CoV-2 selective landscape. *medRxiv* 2021.02.23.21252268 (2021).
21. Escalera-Zamudio, M. *et al.* Identification of site-specific evolutionary trajectories shared across human betacoronaviruses. *bioRxiv* (2021) doi:10.1101/2021.05.24.445313.
22. Kumar, S. *et al.* An evolutionary portrait of the progenitor SARS-CoV-2 and its dominant offshoots in COVID-19 pandemic. *Mol. Biol. Evol.* **38**, 3046–3059 (2021).
23. Vöhringer, H. S. *et al.* Genomic reconstruction of the SARS-CoV-2 epidemic in England. *Nature* **600**, 506–511 (2021).
24. Caniels, T. G. *et al.* Emerging SARS-CoV-2 variants of concern evade humoral immune responses from infection and vaccination. *Sci. Adv.* **7**, eabj5365 (2021).
25. Zhang, X. *et al.* Viral and host factors related to the clinical outcome of COVID-19. *Nature* **583**, 437–440 (2020).
26. Boutin, S. *et al.* Host factors facilitating SARS-CoV-2 virus infection and replication in the lungs. *Cell. Mol. Life Sci.* **78**, 5953–5976 (2021).
27. <https://globalhealthsciences.ucsf.edu/sites/globalhealthsciences.ucsf.edu/files/mexico-covid-19-case-study-english.pdf>.
28. Taboada, B. *et al.* Genomic analysis of early SARS-CoV-2 variants introduced in Mexico. *J. Virol.* **94**, (2020).
29. Ritchie, H. *et al.* Coronavirus Pandemic (COVID-19). *Our World in Data* (2020).
30. MexCoV2. <http://mexcov2.ibt.unam.mx:8080/COVID-TRACKER/>.
31. MexCoV2. <http://mexcov2.ibt.unam.mx:8080/COVID-TRACKER/tablero>.
32. Gutierrez, B. *et al.* Emergence and widespread circulation of a recombinant SARS-CoV-2 lineage in North America. *Cell Host Microbe* (2022) doi:10.1016/j.chom.2022.06.010.
33. Vigilancia de variantes del virus SARS-CoV-2. *Vigilancia de variantes del virus SARS-CoV-2* <https://salud.conacyt.mx/coronavirus/variantes/>.
34. Taboada, B. *et al.* Genetic analysis of SARS-CoV-2 variants in Mexico during the first year of the COVID-19 pandemic. *Viruses* **13**, 2161 (2021).
35. [https://www.gob.mx/cms/uploads/attachment/file/648612/Comunicado\\_Tecnico\\_Diario\\_COVID-19\\_2021.06.25.pdf](https://www.gob.mx/cms/uploads/attachment/file/648612/Comunicado_Tecnico_Diario_COVID-19_2021.06.25.pdf).
36. Cov-lineages. [https://cov-lineages.org/lineages/lineage\\_B.1.1.222.html](https://cov-lineages.org/lineages/lineage_B.1.1.222.html).
37. [https://cov-lineages.org/lineages/lineage\\_B.1.1.519.html](https://cov-lineages.org/lineages/lineage_B.1.1.519.html).
38. Cedro-Tanda, A. *et al.* The evolutionary landscape of SARS-CoV-2 variant B.1.1.519 and its clinical impact in Mexico city. *Viruses* **13**, 2182 (2021).
39. Rodríguez-Maldonado, A. P. *et al.* Emergence and spread of the potential variant of interest (VOI) B.1.1.519 of SARS-CoV-2 predominantly present in Mexico. *Arch. Virol.* **166**, 3173–3177 (2021).
40. Cov-lineages. [https://cov-lineages.org/lineages/lineage\\_B.1.1.519.html](https://cov-lineages.org/lineages/lineage_B.1.1.519.html).
41. Outbreak.info. *outbreak.info* <https://outbreak.info/situation-reports?pango=B.1.1.519>.
42. Cov-lineages. [https://cov-lineages.org/global\\_report\\_B.1.1.7.html](https://cov-lineages.org/global_report_B.1.1.7.html).
43. [https://www.gob.mx/cms/uploads/attachment/file/655969/Comunicado\\_Tecnico\\_Diario\\_COVID-19\\_2021.07.21.pdf](https://www.gob.mx/cms/uploads/attachment/file/655969/Comunicado_Tecnico_Diario_COVID-19_2021.07.21.pdf).
44. Zárate, S. *et al.* The Alpha Variant (B.1.1.7) of SARS-CoV-2 Failed to Become Dominant in Mexico. *Microbiol Spectr* **10**, e0224021 (2022).
45. Faria, N. R. *et al.* Genomics and epidemiology of the P.1 SARS-CoV-2 lineage in Manaus, Brazil. *Science* **372**, 815–821 (2021).

46. Cov-lineages. [https://cov-lineages.org/global\\_report\\_B.1.617.2.html](https://cov-lineages.org/global_report_B.1.617.2.html).
47. Tian, D., Sun, Y., Zhou, J. & Ye, Q. The global epidemic of the SARS-CoV-2 Delta variant, key spike mutations and immune escape. *Front. Immunol.* **12**, 751778 (2021).
48. [https://cov-lineages.org/lineage\\_list.html](https://cov-lineages.org/lineage_list.html).
49. GISAID - initiative. <https://www.gisaid.org/>.
50. SSA/SPPS/DGE/DIE/InDRE/UIES/Informe técnico. COVID. [https://www.gob.mx/cms/uploads/attachment/file/684495/Comunicado\\_Tecnico\\_Diario\\_COVID-19\\_2021.11.30.pdf](https://www.gob.mx/cms/uploads/attachment/file/684495/Comunicado_Tecnico_Diario_COVID-19_2021.11.30.pdf).
51. Cov-lineages. <https://cov-lineages.org/lineage.html?lineage=AY.20>.
52. Cov-lineages. <https://cov-lineages.org/lineage.html?lineage=AY.26>.
53. Cov-lineages. <https://cov-lineages.org/lineage.html?lineage=AY.100>.
54. Cov-lineages. <https://cov-lineages.org/lineage.html?lineage=AY.113>.
55. Cov-lineages. <https://cov-lineages.org/lineage.html?lineage=AY.3>.
56. Washington, N. L. *et al.* Emergence and rapid transmission of SARS-CoV-2 B.1.1.7 in the United States. *Cell* **184**, 2587–2594.e7 (2021).
57. Grenfell, B. T. *et al.* Unifying the epidemiological and evolutionary dynamics of pathogens. *Science* **303**, 327–332 (2004).
58. Thézé, J. *et al.* Genomic epidemiology reconstructs the introduction and spread of Zika virus in central America and Mexico. *Cell Host Microbe* **23**, 855–864.e7 (2018).
59. <https://rss.org.uk/RSS/media/File-library/Publications/Special>.
60. Liu, C. *et al.* Reduced neutralization of SARS-CoV-2 B.1.617 by vaccine and convalescent serum. *Cell* **184**, 4220–4236.e13 (2021).
61. Wilhelm, A. *et al.* Antibody-mediated neutralization of authentic SARS-CoV-2 B.1.617 variants harboring L452R and T478K/E484Q. *Viruses* **13**, 1693 (2021).
62. Haynes, W. A., Kamath, K., Lucas, C., Shon, J. & Iwasaki, A. Impact of B.1.1.7 variant mutations on antibody recognition of linear SARS-CoV-2 epitopes. *bioRxiv* 2021.01.06.20248960 (2021) doi:10.1101/2021.01.06.20248960.
63. Lubinski, B. *et al.* Functional evaluation of the P681H mutation on the proteolytic activation the SARS-CoV-2 variant B.1.1.7 (Alpha) spike. *bioRxiv* (2021) doi:10.1101/2021.04.06.438731.
64. Lista, M. J. *et al.* The P681H mutation in the Spike glycoprotein confers Type I interferon resistance in the SARS-CoV-2 alpha (B.1.1.7) variant. *bioRxiv* 2021.11.09.467693 (2021) doi:10.1101/2021.11.09.467693.
65. Dolan, P. T., Whitfield, Z. J. & Andino, R. Mapping the evolutionary potential of RNA viruses. *Cell Host Microbe* **23**, 435–446 (2018).
66. Emergence and spread of SARS-CoV-2 P.1 (Gamma) lineage variants carrying Spike mutations  $\Delta$ 141–144, N679K or P681H during persistent viral circulation in Amazonas, Brazil. *Virological* <https://virological.org/t/emergence-and-spread-of-sars-cov-2-p-1-gamma-lineage-variants-carrying-spike-mutations-141-144-n679k-or-p681h-during-persistent-viral-circulation-in-amazonas-brazil/722> (2021).
67. CoVariants: 20J (gamma, V3). <https://covariants.org/variants/20J.Gamma.V3>.
68. auspice. [https://nextstrain.org/groups/neherlab/ncov/S.P681?c=gt-S\\_681](https://nextstrain.org/groups/neherlab/ncov/S.P681?c=gt-S_681).
69. <https://observablehq.com/@spond/spike-trends>.
70. CoVariants: S:P681. <https://covariants.org/variants/S.P681>.
71. Gupta, S. & Anderson, R. M. Population structure of pathogens: the role of immune selection. *Parasitol. Today* **15**, 497–501 (1999).
72. Basto-Abreu, A. *et al.* Nationally representative SARS-CoV-2 antibody prevalence estimates after the first epidemic wave in Mexico. *Nat. Commun.* **13**, 589 (2022).
73. Muñoz-Medina, J. E. *et al.* SARS-CoV-2 IgG antibodies seroprevalence and Sera neutralizing activity in MEXICO: A national cross-sectional study during 2020. *Microorganisms* **9**, 850 (2021).
74. Bhatia, G., Dutta, P. K., McClure, J. & Reuters Graphics. Mexico: the latest coronavirus counts, charts and maps. *Reuters* (2020).
75. <https://coronavirus.gob.mx/semaforo/>.
76. Kraemer, M. U. G. *et al.* The effect of human mobility and control measures on the COVID-19 epidemic in China. *Science* **368**, 493–497 (2020).
77. Migration data in central America. *Migration data portal* <https://www.migrationdataportal.org/regional-data-overview/migration-data-central-america>.
78. Migrants trapped in the Mexican vertical border. *Oxford Law Faculty* <https://www.law.ox.ac.uk/research-subject-groups/centre-criminology/centreborder-criminologies/blog/2018/06/migrants-trapped> (2018).
79. París-Pombo, M. D. & El Colegio de la Frontera Norte, México. Trayectos peligrosos: inseguridad y movilidad humana en México. *Papeles Poblac.* **22**, 145–172 (2016).
80. Kalkauskas, A. *et al.* Sampling bias and model choice in continuous phylogeography: Getting lost on a random walk. *PLoS Comput. Biol.* **17**, e1008561 (2021).
81. De Maio, N., Wu, C.-H., O'Reilly, K. M. & Wilson, D. New routes to phylogeography: A Bayesian STructured coalescent Approximation. *PLoS Genet.* **11**, e1005421 (2015).
82. No title. <https://academic.oup.com/ve/article/7/2/veab051/6292076?login=true>.
83. Shu, Y. & McCauley, J. GISAID: Global initiative on sharing all influenza data - from vision to reality. *Euro Surveill.* **22**, (2017).
84. Aksamentov, I., Roemer, C., Hodcroft, E. & Neher, R. Nextclade: clade assignment, mutation calling and quality control for viral genomes. *J. Open Source Softw.* **6**, 3773 (2021).
85. Li, H. Minimap2: pairwise alignment for nucleotide sequences. *Bioinformatics* **34**, 3094–3100 (2018).
86. Kraemer, M. U. G. *et al.* Mapping global variation in human mobility. *Nat. Hum. Behav.* **4**, 800–810 (2020).
87. Inward, R. P. D., Parag, K. V. & Faria, N. R. Using multiple sampling strategies to estimate SARS-CoV-2 epidemiological parameters from genomic sequencing data. *bioRxiv* 2022.02.04.22270165 (2022) doi:10.1101/2022.02.04.22270165.
88. COVID-19 tablero México. *COVID - 19 Tablero México* <https://datos.covid-19.conacyt.mx/>.
89. Minh, B. Q. *et al.* IQ-TREE 2: New Models and Efficient Methods for Phylogenetic Inference in the Genomic Era. *Mol. Biol. Evol.* **37**, 1530–1534 (2020).
90. Menardo, F. *et al.* Treemmer: a tool to reduce large phylogenetic datasets with minimal loss of diversity. *BMC Bioinformatics* **19**, (2018).
91. Rambaut, A., Lam, T. T., Max Carvalho, L. & Pybus, O. G. Exploring the temporal structure of heterochronous sequences using TempEst (formerly Path-O-Gen). *Virus Evol.* **2**, vew007 (2016).

92. Sagulenko, P., Puller, V. & Neher, R. A. TreeTime: Maximum-likelihood phylodynamic analysis. *Virus Evol.* **4**, vex042 (2018).
93. Su, Y. C. F. *et al.* Discovery and genomic characterization of a 382-nucleotide deletion in ORF7b and ORF8 during the early evolution of SARS-CoV-2. *MBio* **11**, (2020).
94. MacLean, O. A., Orton, R. J., Singer, J. B. & Robertson, D. L. No evidence for distinct types in the evolution of SARS-CoV-2. *Virus Evol.* **6**, veaa034 (2020).
95. Dellicour, S. *et al.* A phylodynamic workflow to rapidly gain insights into the dispersal history and dynamics of SARS-CoV-2 lineages. *Mol. Biol. Evol.* **38**, 1608–1613 (2021).
96. Suchard, M. A. *et al.* Bayesian phylogenetic and phylodynamic data integration using BEAST 1.10. *Virus Evol.* **4**, vey016 (2018).
97. Lemey, P., Rambaut, A., Drummond, A. J. & Suchard, M. A. Bayesian phylogeography finds its roots. *PLoS Comput. Biol.* **5**, e1000520 (2009).
98. Rambaut, A., Drummond, A. J., Xie, D., Baele, G. & Suchard, M. A. Posterior summarization in Bayesian phylogenetics using tracer 1.7. *Syst. Biol.* **67**, 901–904 (2018).
99. Bielejec, F. *et al.* Spred3: Interactive visualization of spatiotemporal history and trait evolutionary processes. *Mol. Biol. Evol.* **33**, 2167–2169 (2016).
100. Fontanelli, O. *et al.* Intermunicipal travel networks of Mexico (2020-2021). *arXiv [cs.SI]* (2022).
101. Blokker, T., Baele, G., Lemey, P. & Dellicour, S. Phycova - a tool for exploring covariates of pathogen spread. *Virus Evol.* **8**, veac015 (2022).
102. <https://covid19.sinave.gob.m>.

**Figure 1**

**(a)**

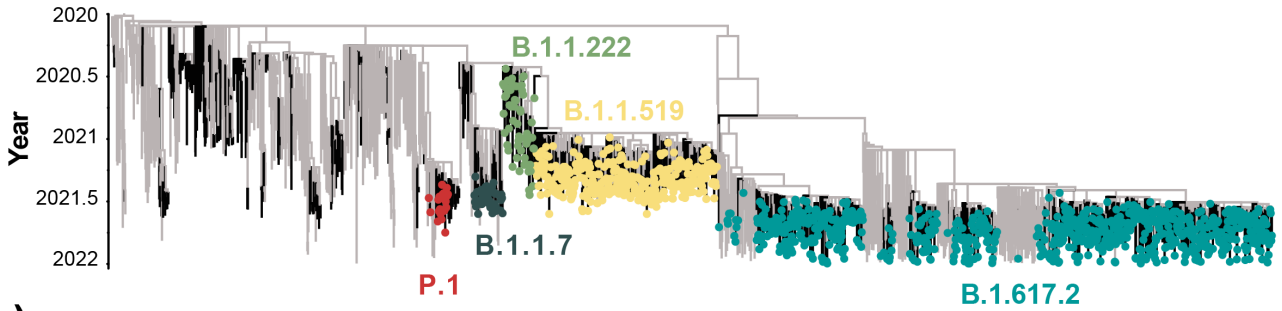

**(b)**

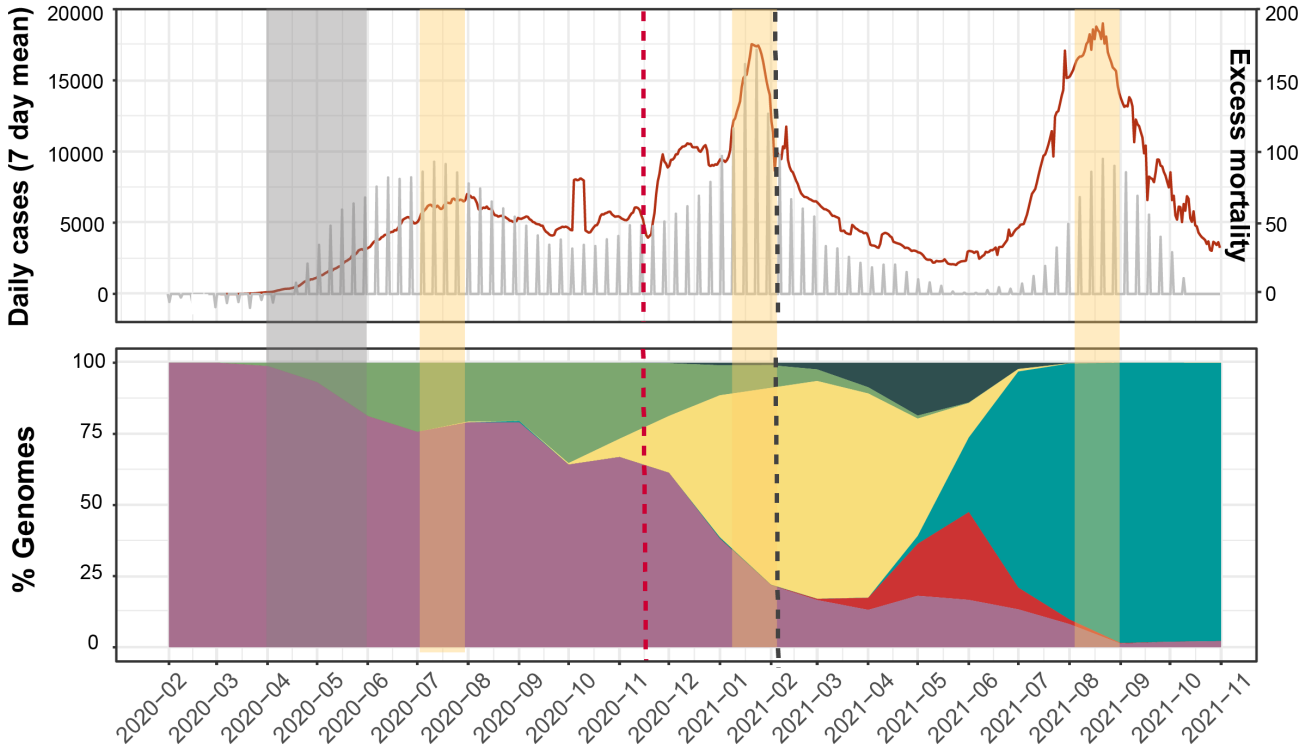

**(c)**

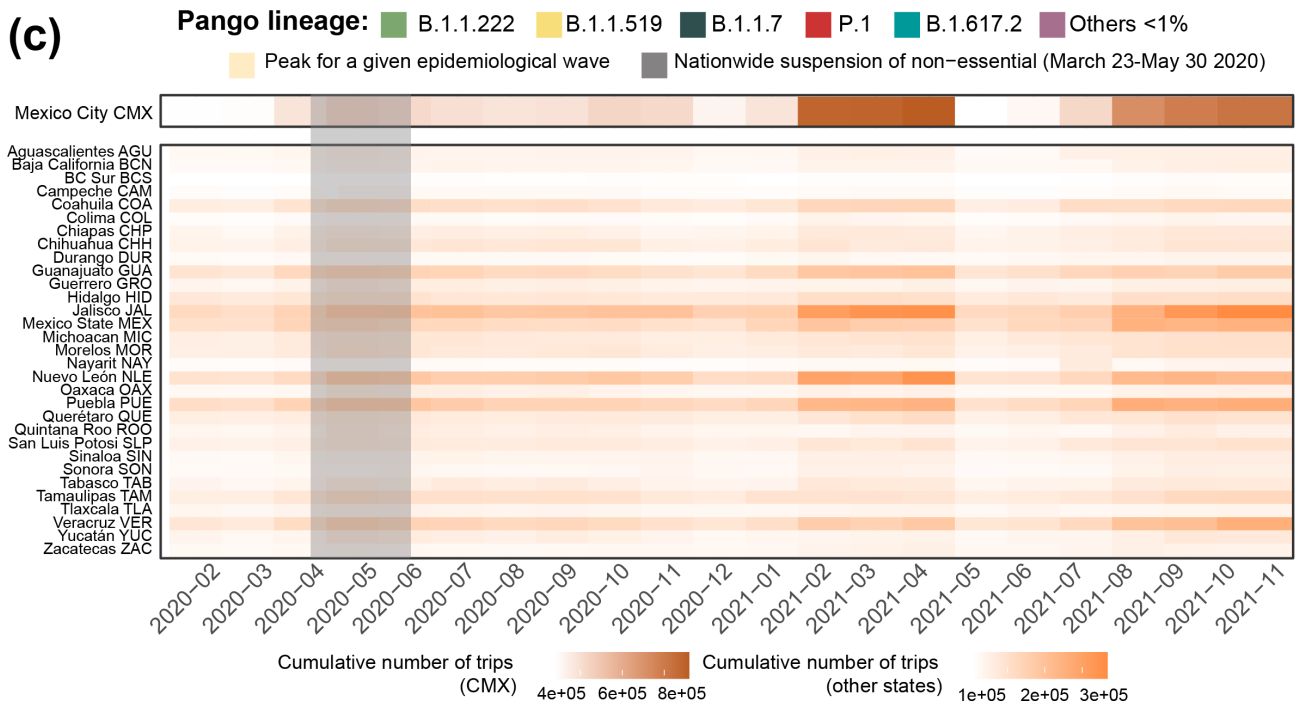



Figure 2

(a) B.1.1.222

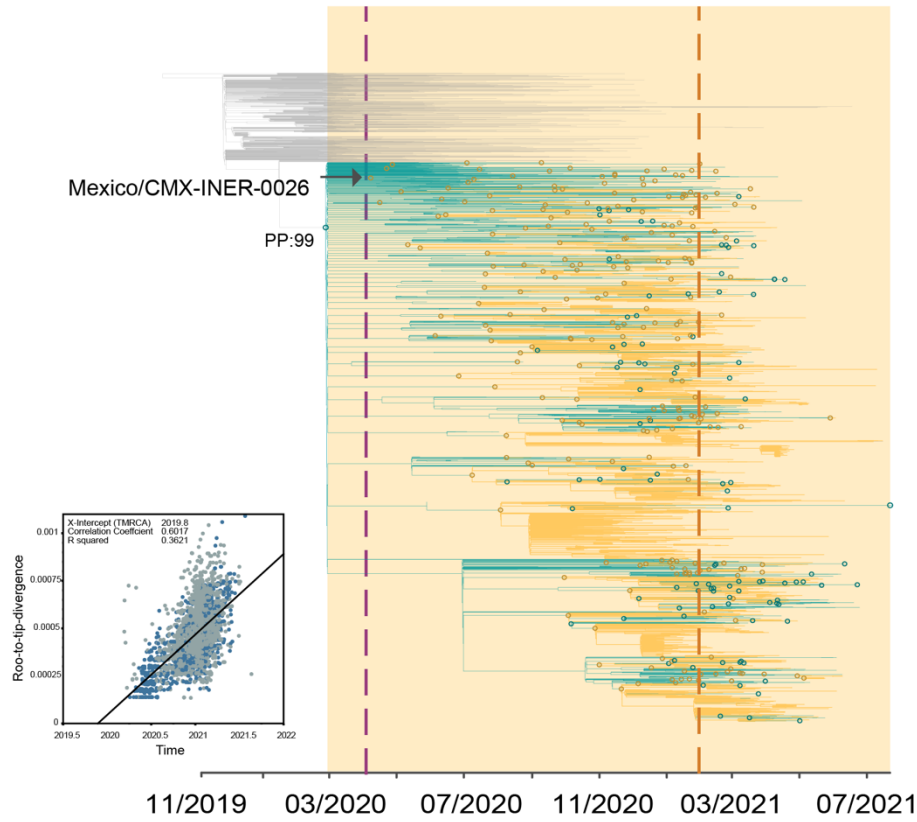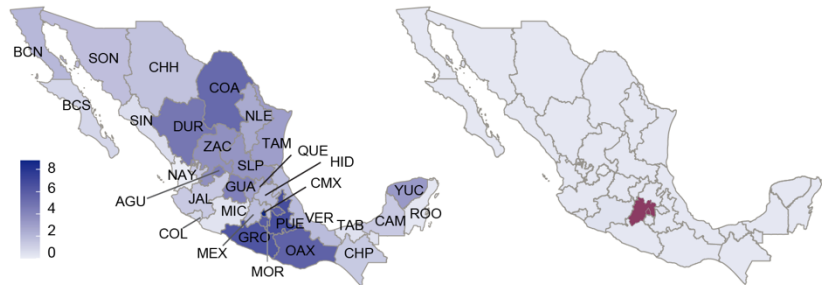

% B.1.1.222 genomes sequenced from 2020-04-04 to 2021-07-26

Distribution of clades (transmission chains) ■ B.1.1.222

(b) B.1.1.519

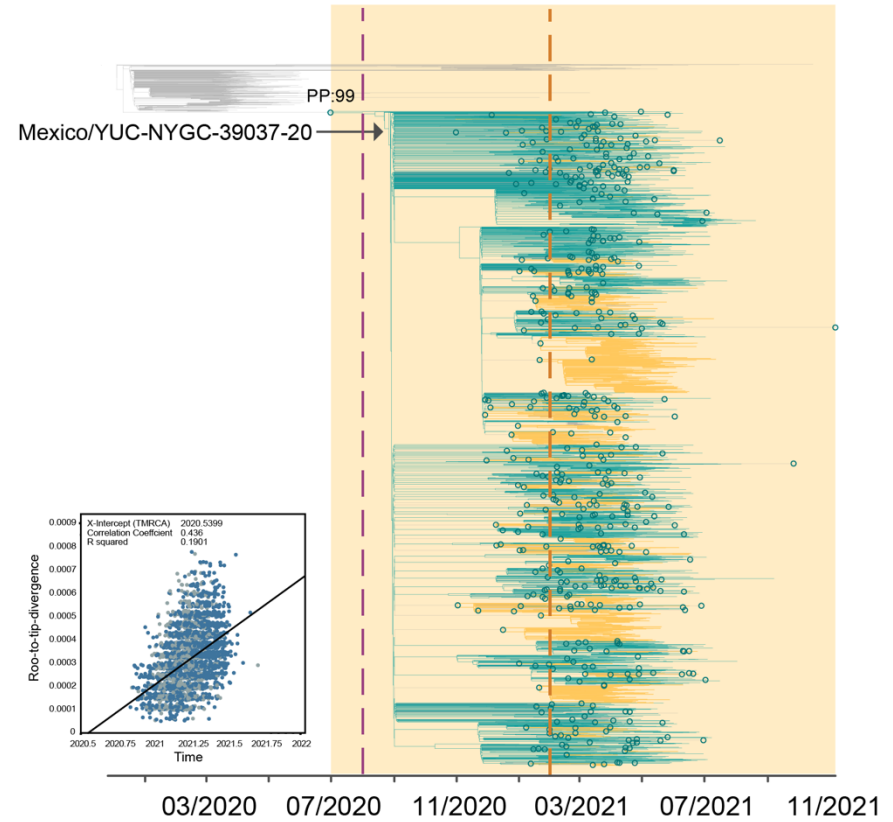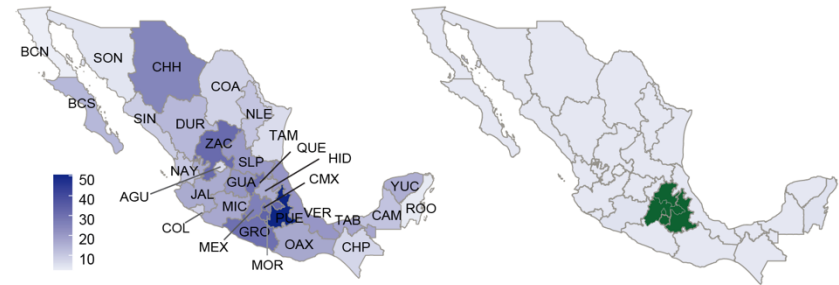

% B.1.1.519 genomes sequenced from 2020-08-28 to 2021-11-01

Distribution of clades (transmission chains) ■ B.1.1.519

Figure 3

(a) B.1.1.7

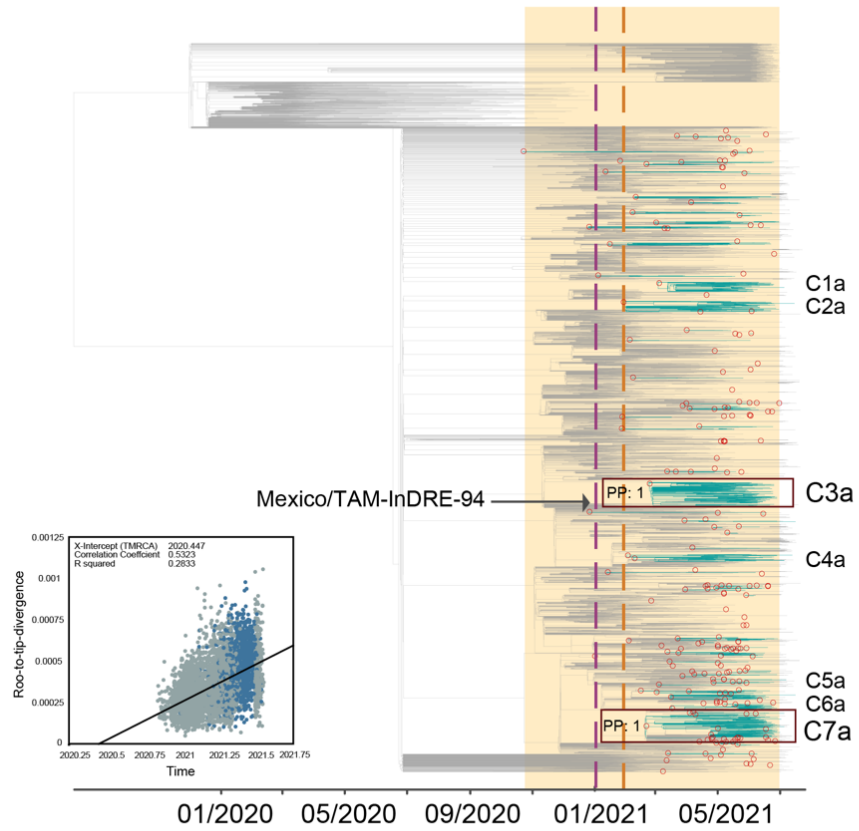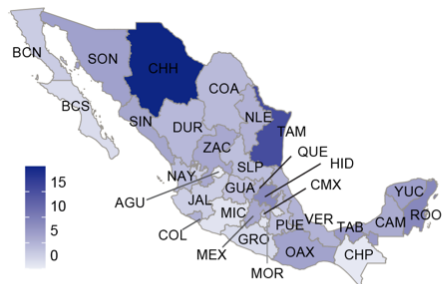

% B.1.1.7 genomes sequenced from 2020-12-31 to 2021-10-13

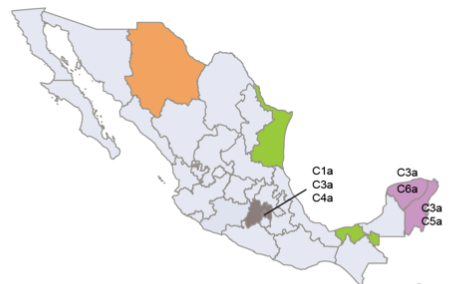

Distribution of clades (transmission chains)

(b) P.1+

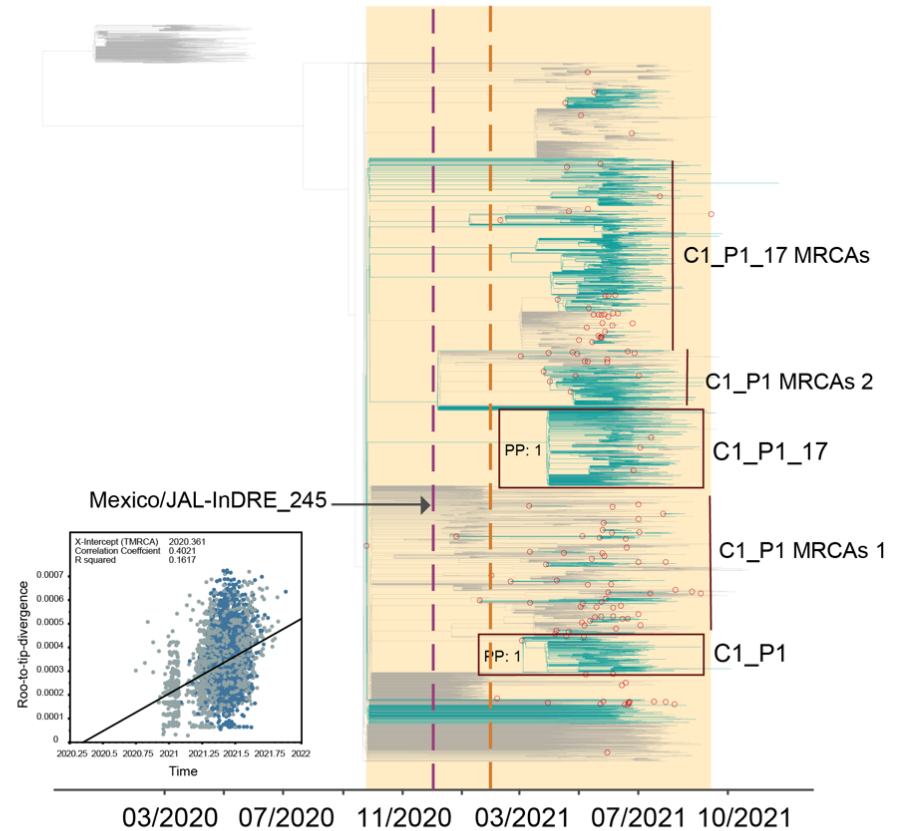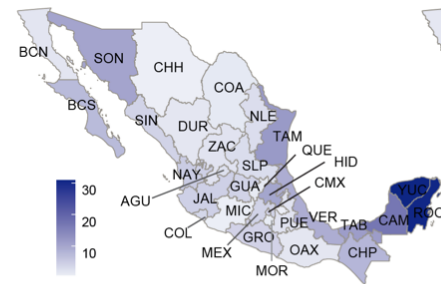

% P.1+ genomes sequenced from 2021-01-28 to 2021-11-19

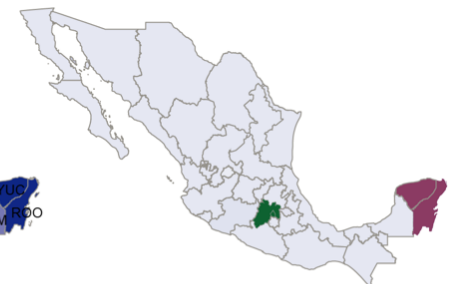

Distribution of clades (transmission chains)

Figure 4

# B.1.617.2+

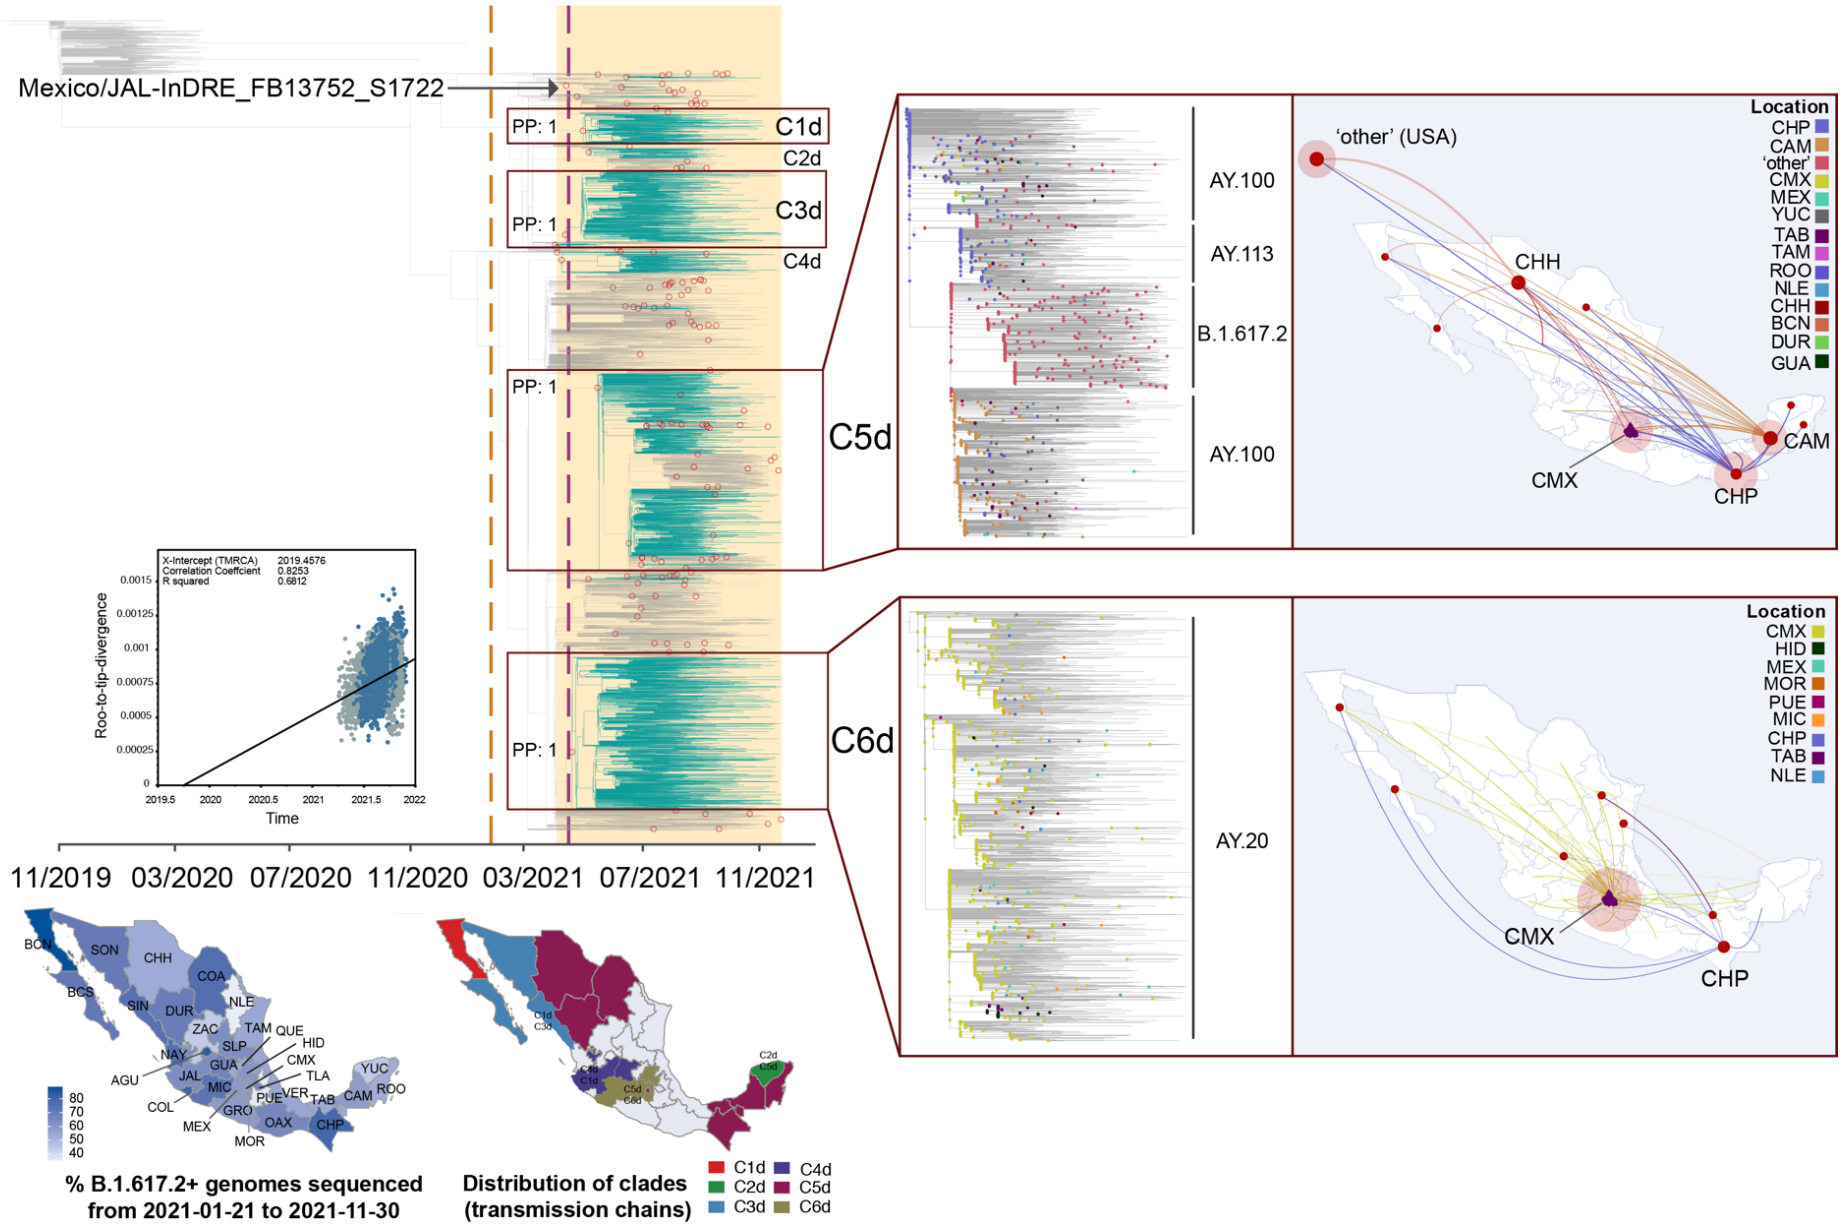

Figure 1- figure supplement 1

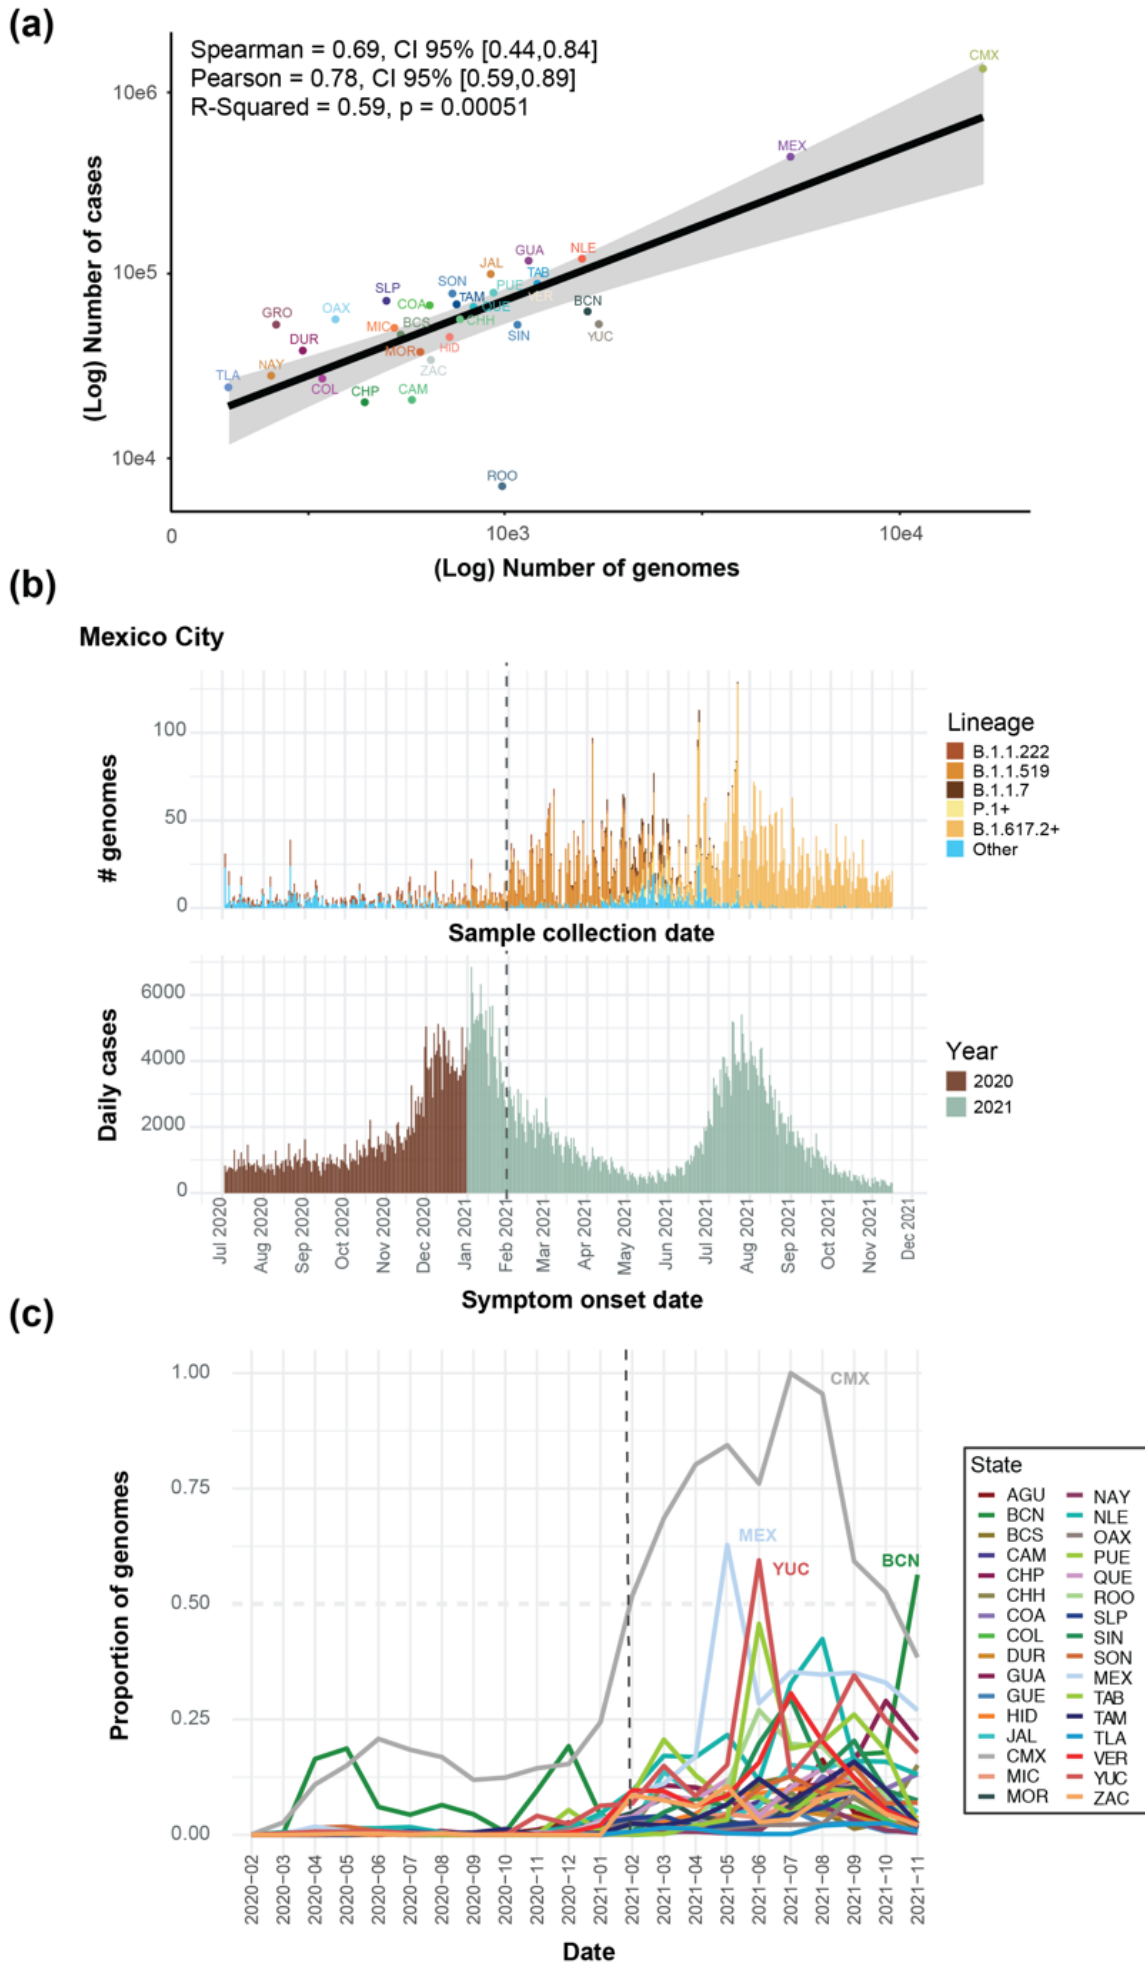

Figure 1- figure supplement 2

(a)

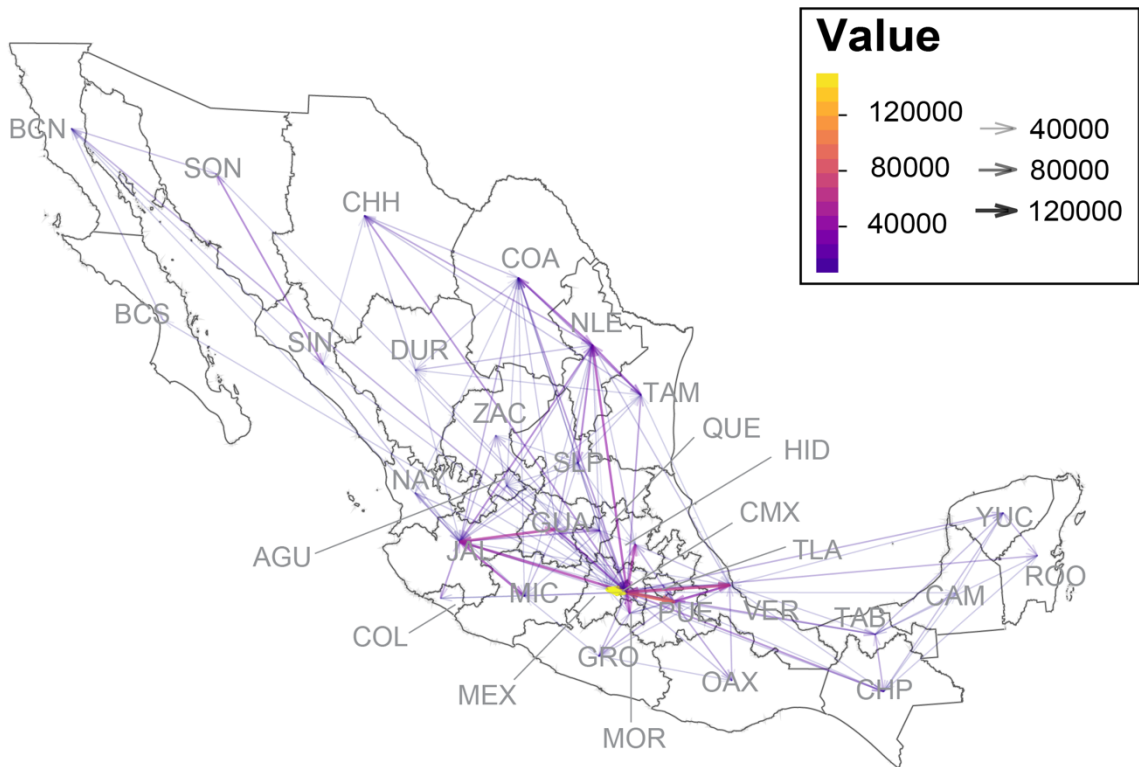

(b)

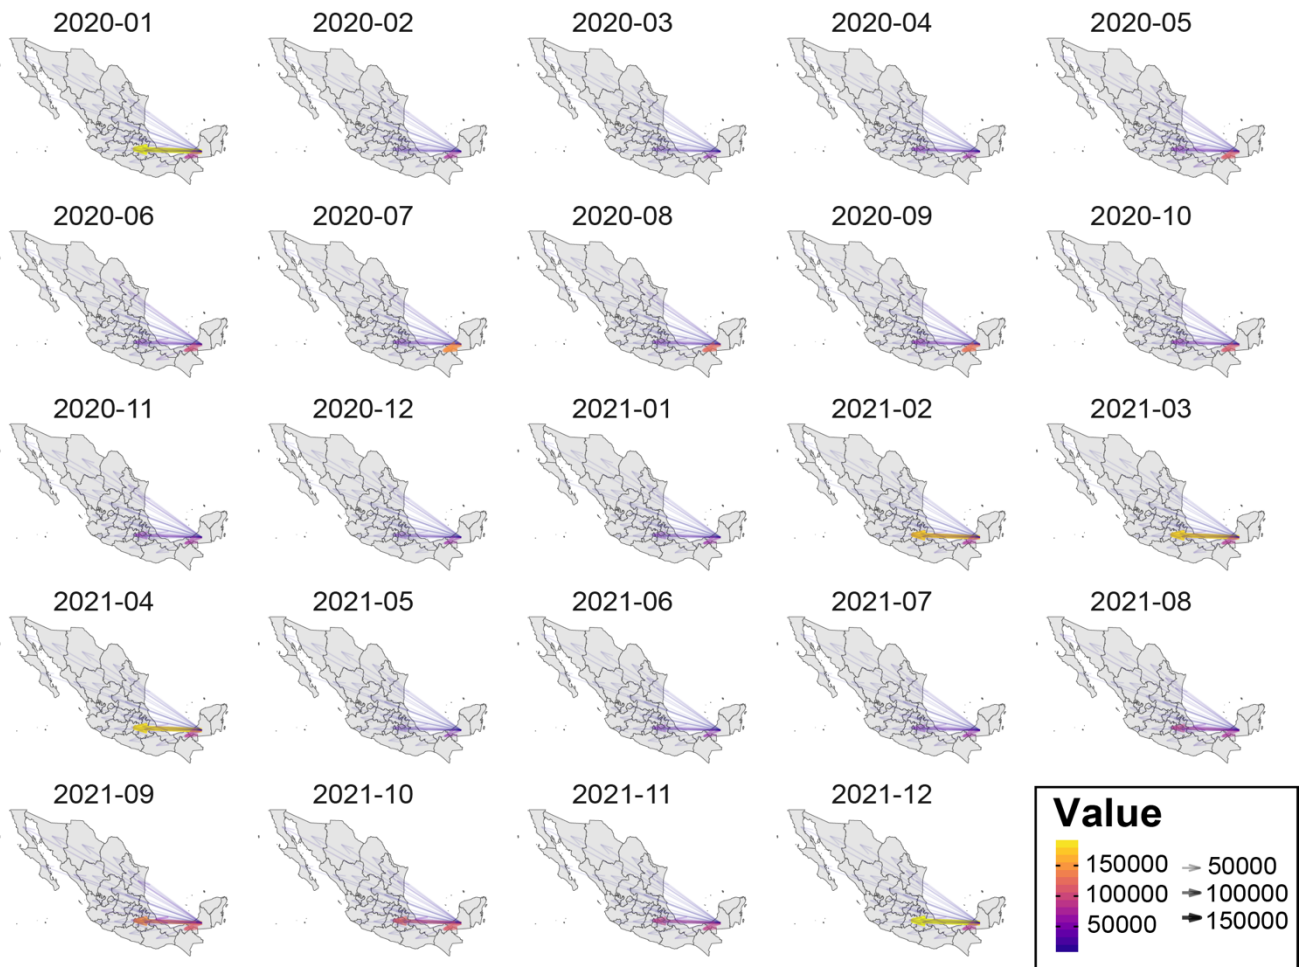

Figure 3- figure supplement 1

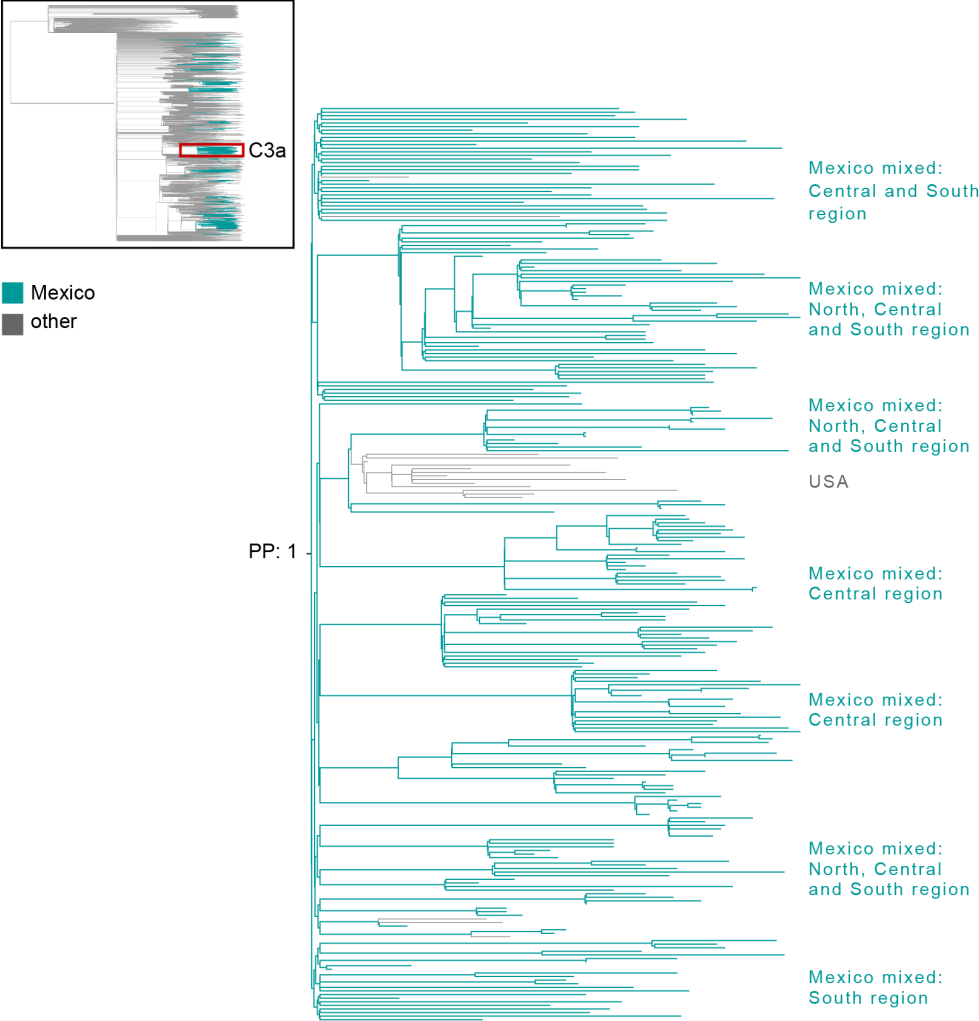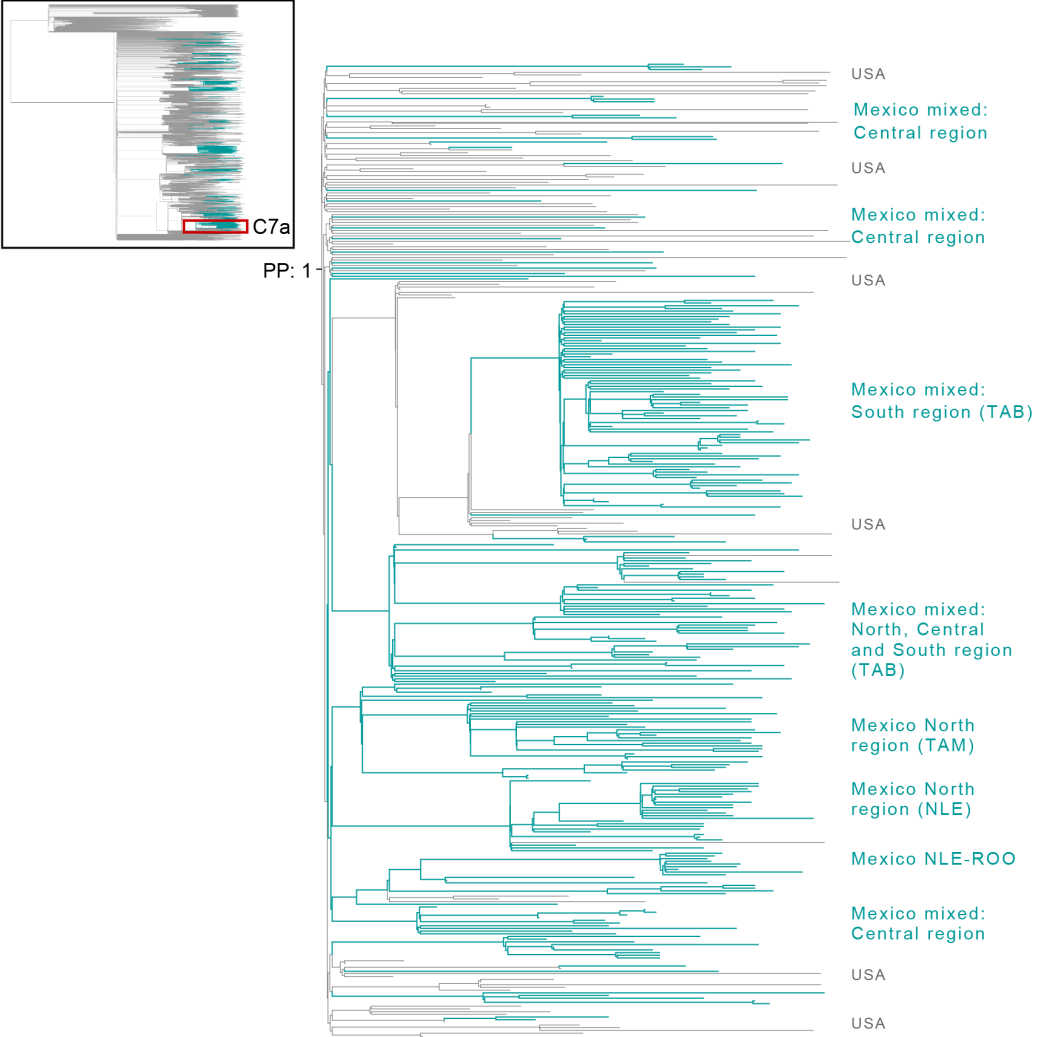

Figure 3- figure supplement 2

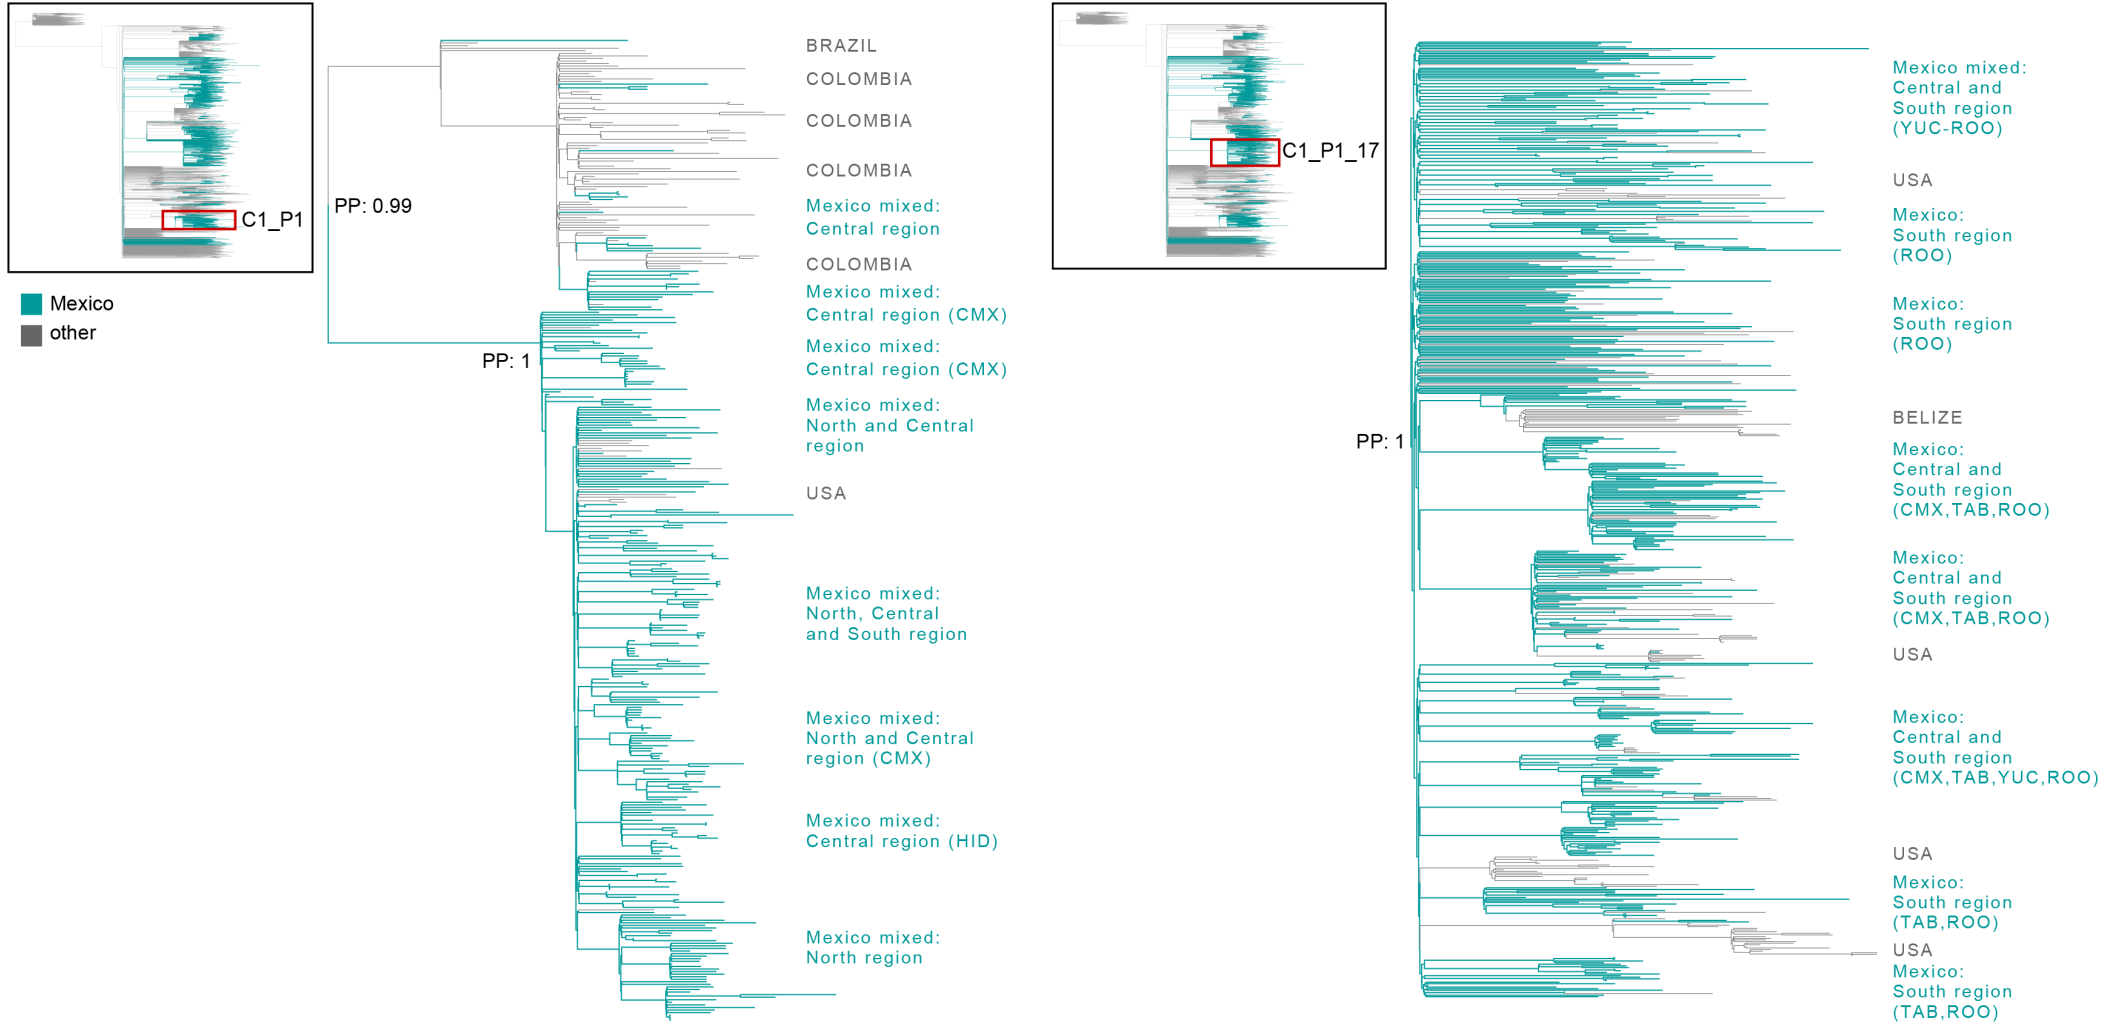

## Appendix 1

### Description of the approach employed to validate our migration-informed subsampling

#### METHODS

Our migration-informed approach aims to mitigate the effects of geographical over-representation impacting phylogeographic analyses, in which some regions may appear more frequently as seeding sources than they actually are. Applied to the B.1.617.2 (representing the best sampled lineage in Mexico), we sought to further validate our migration-informed genome subsampling approach by analysing an independent dataset built using a different migration sub-sampling scheme. This new scheme now comprised sub-sampling from all countries represented by B.1.617.2+ sequences deposited in GISAID (available up to November 30<sup>th</sup> 2021). For this, complete virus genome sequences assigned to the B.1.617.2+ lineage collected globally up to November 30<sup>th</sup> 2021 available from GISAID (<https://www.gisaid.org/>) were downloaded as of December 26<sup>th</sup> 2022. Genome sequences were quality filtered and retained according to the criteria stated in Methods Section 1 (see main text). Genome sequences were further sub-sampled in order to obtain an equal and homogeneous spatial and temporal representation of all geographic regions represented by all the sequences downloaded from GISAID (*i.e.*, countries), keeping the number of sampled sequences proportional to the number of cases officially reported from Mexico (corresponding to the epidemiological weeks matching the circulation period of the B.1.617.2 lineage within the country). We further added the set of earliest SARS-CoV-2 sequences sampled globally ('ROOT' outgroup), and the 3,320 subsampled genome sequences available from Mexico (used in the original B.1.617.2+ dataset, as described in Methods Section 2, main text). The final dataset resulted in an alignment of 25,107 columns and 6,912 sequences. Subsampling resulted in a homogeneous representation of  $\approx 70$  countries with an equal number of sequences (10-80 genome per country) per country, relative to their representation in GISAID (**Figure 1**). From these, approximately 3,570 genome sequences were sampled from any other country (*i.e.*, 'global' sample), preserving the 1:1 sequence ratio of 'Mexico' vs 'non-Mexico' sequences. The resulting new dataset was further processed and analysed to infer the number of introduction events into Mexico (corresponding to MRCA nodes associated to independent 'Mexico' clades), following the steps described in Methods Section 4 (in main text).

#### RESULTS AND DISCUSSION

In the new dataset, <100 genome sequences from the USA were retained for further analysis (**Figure 1**), compared to approximately 2,000 genome sequences from the USA included in the original B.1.617.2+ alignment. Thus, we expected a lower number of inferred introduction events into Mexico, as an under-sampling of viral genome sequences from the USA is likely to result in 'Mexico' clades not fully segregating (particularly impacting C5d). Our original results revealed a minimum number of 142 introduction events into Mexico (95% HPD interval = [125-148]), with 6 major clades identified (denoting extended transmission chains). The DTA results derived from the new dataset (subsampling all countries) revealed a minimum number of 84 introduction events into Mexico (95% HPD interval = [81-87]), with again 6 major clades identified (**Figure 2**).

Thus, a significantly lower number of introduction events into Mexico were inferred, as was expected. On the other hand, the number of clades identified were consistent between both datasets, supporting for the robustness of our phylogenetic methodological approach. However, in the new dataset, we observe that C5d displayed a reduced diversity, represented by the AY.113 and AY.100 genomes from Mexico, but excluded the B.1.617.2 genome sampled from the USA (as seen in Taboada et al, 2022). This highlights the relevance of our genome sub-sampling using migration data as a proxy. In further agreement with our observations, publicly available data on global human mobility (<https://migration-demography-tools.jrc.ec.europa.eu/data-hub/index.html?state=5d6005b30045242cabd750a2>) shows



that migration into Mexico is mostly represented by movements from the USA, followed by Indonesia, Guatemala, Belize and Colombia. However, the volume of movements from the USA into Mexico is much higher (up to 6 orders of magnitude above the volumes recorded into Mexico from any other country). This further supports for our migration informed subsampling approach of selecting only the top 5 countries with the highest migration rate into Mexico.

## **Appendix 1- Figure legends**

### **Appendix 1-Figure 1. Distribution plots for each genome dataset before and after applying our migration- and phylogenetically-informed subsampling pipeline**

Distribution plots for the number of genomes in the datasets before and after applying our subsampling pipeline. Plots for the B.1.1.519 (a and b), B.1.1.7 (c and d), P.1+ (e and f), and B.1.617.2+ (g and h) show the total number of sampled genomes coloured according to location, ranked according to the countries representing the most intense human mobility flow into Mexico derived from anonymized relative human mobility flow into different geographical regions.

### **Appendix 1-Figure 2. Distribution of genome sequences the new B.1.617.2+ dataset after subsampling under a different migration-informed approach (validation)**

Distribution of the number of genomes in the dataset corresponding to an alternative sub-sample of B.1.617.2+ sequences used for the validation of our migration informed subsampling approach. The dataset was built to obtain a homogeneous and proportional number of genome sequences from all countries sampled in GISAID (relative to their availability in the platform). The total number of genomes sequences sampled per region (represented by countries grouped by continent) are coloured according to their continent of origin. To compare to the distribution of genome sequences before subsampling, see **Appendix 1-Figure 1** above.

### **Appendix 1-Figure 2. DTA analysis for the new B.1.617.2+ dataset (validation)**

Maximum clade credibility (MCC) tree for the alternative B.1.617.2+ dataset comprising a sub-sampling from all countries, represented by B.1.617.2+ sequences deposited in GISAID available up to November 30<sup>th</sup> 2021, in which major clades identified as distinct introduction events into Mexico are highlighted. Nodes shown as red circles correspond to the inferred most recent common ancestor (MRCA) for clades representing independent introduction events into Mexico.

## Appendix 1-Figure 1

### B.1.1.519

a) Total # of sequences before subsampling

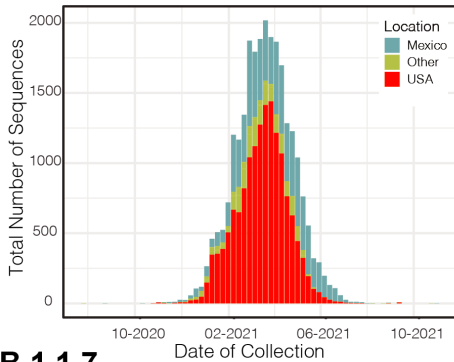

b) Total # of sequences after subsampling

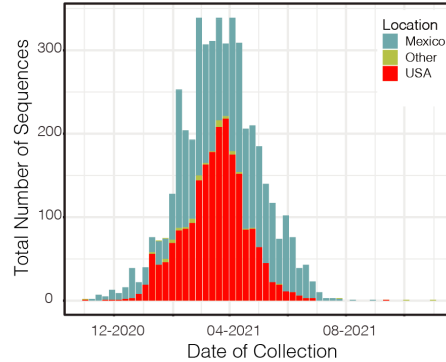

### B.1.1.7

c) Total # of sequences before subsampling

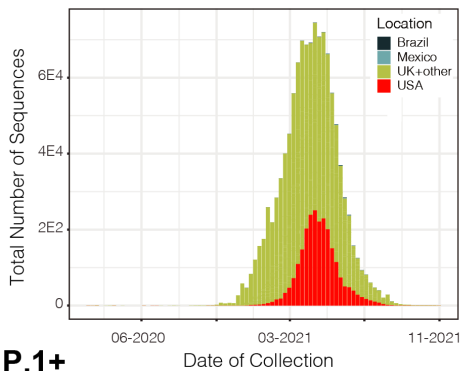

d) Total # of sequences after subsampling

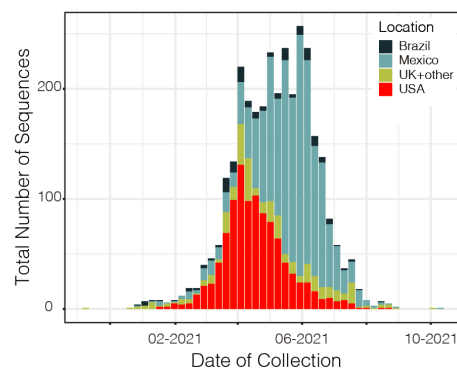

### P.1+

e) Total # of sequences before subsampling

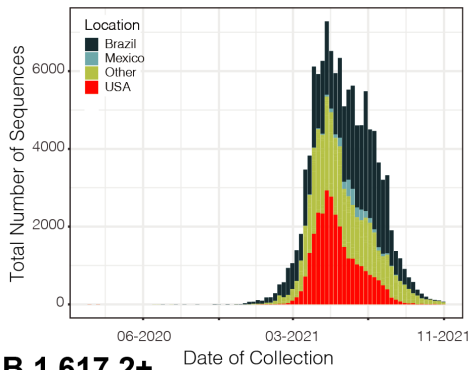

f) Total # of sequences after subsampling

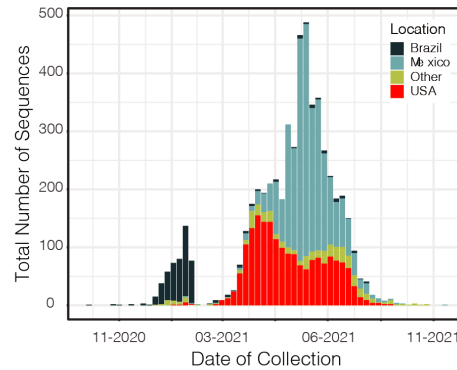

### B.1.617.2+

g) Total # of sequences before subsampling

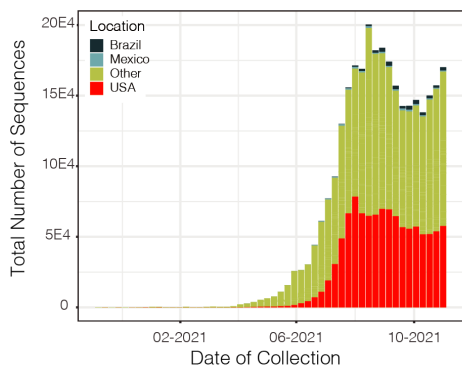

h) Total # of sequences after subsampling

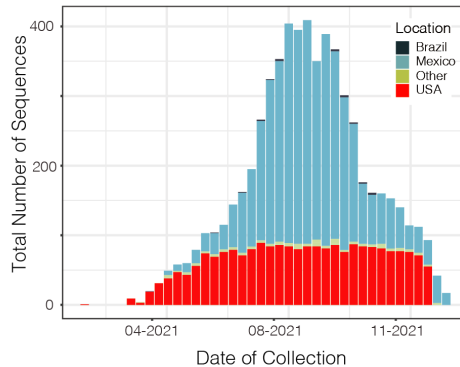

## Appendix 1-Figure 2

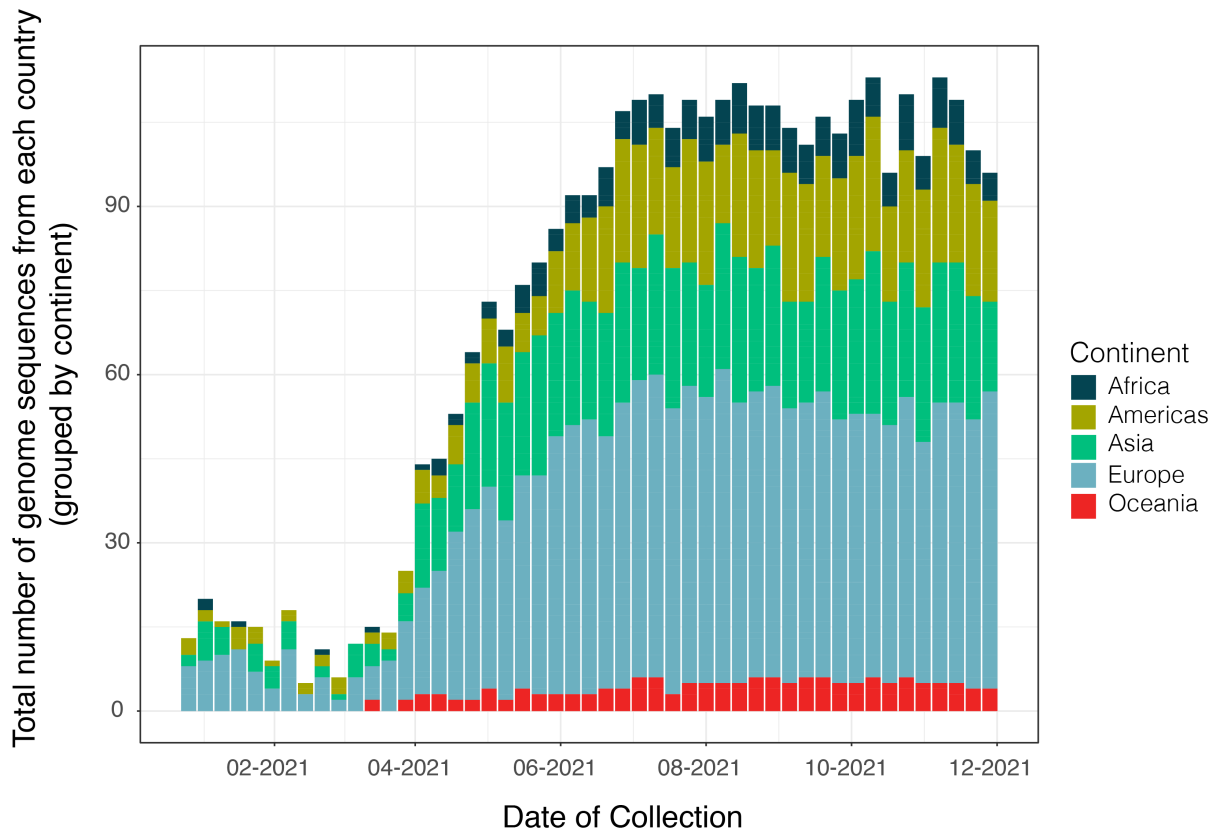

### Appendix 1-Figure 3

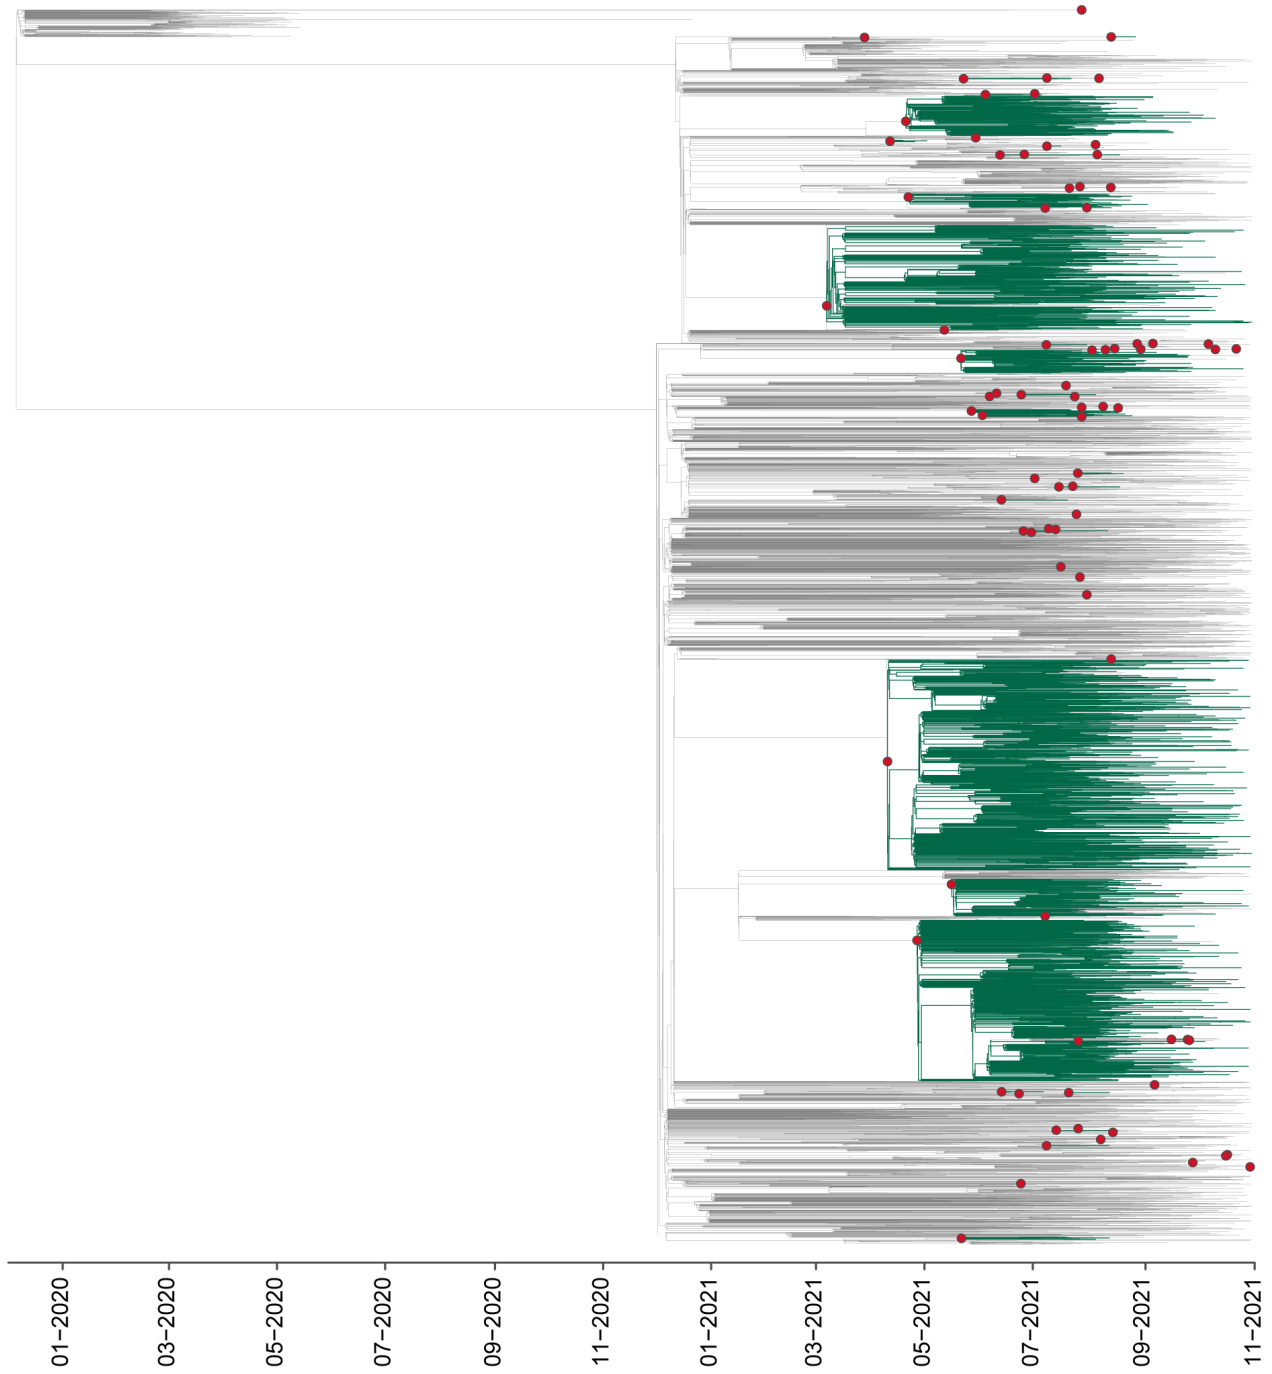

Source: https://biorxiv.org/content/10.1101/2022.07.05.498834v3.full.pdf
